# Supplementary material
Source: PubMed Central journal article supplement (PMC3162187)
Supplement: mmc1.pdf [file mmc1.pdf]

# C-reactive protein and risk of coronary heart disease, stroke, and mortality: individual participant meta-analysis

The Emerging Risk Factors Collaboration\*

Lancet 2009; 374

## Supplementary materials

### eTables

|                                                                                                                                                                                                                        |    |
|------------------------------------------------------------------------------------------------------------------------------------------------------------------------------------------------------------------------|----|
| eTable 1. Descriptive summaries by study of baseline characteristics of participants, follow up time, and number of outcomes contributed.....                                                                          | 2  |
| eTable 2. Study level characteristics and laboratory methods for measurement of CRP.....                                                                                                                               | 4  |
| eTable 3. Characterisation of baseline and incident vascular disease outcomes in the contributing studies.....                                                                                                         | 6  |
| eTable 4. Summary of data available and associations with CRP levels.....                                                                                                                                              | 8  |
| eTable 5. Risk ratios for vascular disease and non-vascular mortality per 3-fold higher baseline and usual CRP levels and between study heterogeneity statistics.....                                                  | 9  |
| eTable 6. Risk ratios for vascular and nonvascular mortality per 3-fold higher usual CRP levels with progressive adjustment for usual levels of potential confounders.....                                             | 10 |
| eTable 7. Risk ratios for vascular and non-vascular mortality per 3-fold higher usual CRP levels with adjustment for usual levels of conventional risk factors plus inflammatory markers.....                          | 11 |
| eTable 8. Risk ratios for major vascular and nonvascular outcomes per 3-fold higher baseline CRP levels with progressive adjustment for baseline levels of potential confounders.....                                  | 12 |
| eTable 9. Risk ratios for major vascular and nonvascular outcomes per 3-fold higher usual CRP levels with progressive adjustment for usual levels of potential confounders, pooled by fixed effects meta-analysis..... | 13 |
| eTable 10. Risk ratios for vascular and nonvascular mortality without censoring for non-fatal events per 3-fold higher usual CRP levels with progressive adjustment for usual levels of potential confounders.....     | 14 |

### eFigures

|                                                                                                                                                                                                                                         |    |
|-----------------------------------------------------------------------------------------------------------------------------------------------------------------------------------------------------------------------------------------|----|
| eFigure 1. Study flow diagram.....                                                                                                                                                                                                      | 15 |
| eFigure 2. Regression dilution ratios for log <sub>e</sub> CRP concentration plotted against time since baseline measurement by study.....                                                                                              | 16 |
| eFigure 3. Risk ratios for major vascular and nonvascular outcomes by quantiles of CRP levels, with different degree of adjustment for potential confounders, after excluding data from first 5 years of follow up.....                 | 17 |
| eFigure 4. Age- and sex- adjusted only risk ratios for vascular and non-vascular mortality per 3-fold higher usual CRP levels after (a) excluding current smokers and (b) excluding data from first 5 years of follow up.....           | 18 |
| eFigure 5. Direct comparison of risk ratios for coronary heart disease per 1-SD higher log <sub>e</sub> CRP with those of systolic blood pressure and lipids mutually adjusted for each other plus other conventional risk factors..... | 19 |
| eFigure 6. Risk ratios for coronary heart disease per 3-fold higher usual CRP according to several individual level characteristics.....                                                                                                | 20 |
| eFigure 7. Risk ratios for coronary heart disease per 3-fold higher usual CRP according to several individual level characteristics.....                                                                                                | 21 |
| eFigure 8. Study-specific risk ratios for CHD per 3-fold higher usual CRP levels adjusted for all the factors in the final model in Table 2.....                                                                                        | 22 |
| eFigure 9. Risk ratios for vascular and nonvascular mortality without censoring for non-fatal outcomes by quantiles of CRP levels with different degree of adjustment for potential confounders.....                                    | 23 |
| eFigure 10. Meta-regression plots assessing potential bias from small study effects in the meta-analysis of association of CRP levels and CHD risk.....                                                                                 | 24 |

|                                               |           |
|-----------------------------------------------|-----------|
| <b>Supplementary Material References.....</b> | <b>25</b> |
|-----------------------------------------------|-----------|

**eTable 1. Descriptive summaries by study of baseline characteristics of participants, follow up time, and number of outcomes contributed.**

| Study design/ Study     | Number of cohorts | Total No. with CRP measured | Males (%)   | Age (yrs) mean (SD) | Follow up (yrs) median (5, 95) percentiles | Log <sub>e</sub> CRP (log <sub>e</sub> mg/l) mean(sd) | Non-fatal MI and CHD death | CHD deaths | Non-fatal MI | Fatal MI | All cerebrovascular events | Haemorrhagic stroke | Ischaemic stroke | Unclassified stroke | Other vascular deaths | All vascular deaths | Non-vascular deaths | Unclassified deaths | All-cause mortality |
|-------------------------|-------------------|-----------------------------|-------------|---------------------|--------------------------------------------|-------------------------------------------------------|----------------------------|------------|--------------|----------|----------------------------|---------------------|------------------|---------------------|-----------------------|---------------------|---------------------|---------------------|---------------------|
| Cohort                  |                   |                             |             |                     |                                            |                                                       |                            |            |              |          |                            |                     |                  |                     |                       |                     |                     |                     |                     |
| ATTICA <sup>1</sup>     | 1                 | 1442                        | 744 (52%)   | 50.5 (11.0)         | 5.0 (5.0, 5.0)                             | 0.13 (1.10)                                           | 0                          | 0          | 0            | 0        | 0                          | 0                   | 0                | 0                   | 25                    | 25                  | 17                  | 0                   | 42                  |
| BRUN <sup>2</sup>       | 1                 | 817                         | 398 (49%)   | 57.9 (11.4)         | 15.3 (3.9, 15.5)                           | 0.48 (0.94)                                           | 54                         | 31         | 23           | 19       | 40                         | 15                  | 24               | 0                   | 7                     | 56                  | 123                 | 1                   | 180                 |
| BWHHS <sup>3</sup>      | 1                 | 3156                        | 0 (0%)      | 68.5 (5.5)          | 4.6 (2.0, 5.6)                             | 0.52 (1.14)                                           | 55                         | 23         | 32           | 12       | 46                         | 4                   | 20               | 14                  | 13                    | 54                  | 148                 | 2                   | 204                 |
| CAPS <sup>4</sup>       | 1                 | 848                         | 848 (100%)  | 57.3 (4.6)          | 8.0 (4.1, 8.3)                             | 0.51 (1.05)                                           | 56                         | 19         | 37           | 12       | 2                          | 0                   | 0                | 2                   | 6                     | 27                  | 60                  | 0                   | 87                  |
| CHS <sup>5</sup>        | 1                 | 4333                        | 1658 (38%)  | 72.3 (5.2)          | 11.1 (1.9, 12.9)                           | 0.89 (1.02)                                           | 640                        | 233        | 407          | 233      | 514                        | 67                  | 406              | 41                  | 62                    | 297                 | 864                 | 2                   | 1163                |
| COPEX <sup>6</sup>      | 1                 | 7479                        | 3172 (42%)  | 59.7 (13.5)         | 7.3 (1.8, 8.8)                             | 0.73 (0.78)                                           | 248                        | 32         | 216          | 0        | 301                        | 35                  | 166              | 85                  | 90                    | 138                 | 520                 | 68                  | 726                 |
| EAS <sup>7</sup>        | 1                 | 754                         | 365 (48%)   | 64.2 (5.6)          | 15.1 (2.3, 15.7)                           | 0.60 (1.10)                                           | 60                         | 28         | 32           | 21       | 50                         | 2                   | 0                | 44                  | 13                    | 56                  | 155                 | 2                   | 213                 |
| ESTHER <sup>8</sup>     | 1                 | 7894                        | 3304 (42%)  | 61.6 (6.6)          | 2.0 (1.9, 2.7)                             | 0.74 (1.08)                                           | 58                         | 10         | 48           | 8        | 86                         | 1                   | 3                | 81                  | 4                     | 21                  | 68                  | 11                  | 100                 |
| FINRISK9 <sup>9</sup>   | 1                 | 1266                        | 1266 (100%) | 61.6 (8.6)          | 6.8 (1.8, 6.9)                             | 0.61 (1.19)                                           | 72                         | 24         | 48           | 14       | 57                         | 11                  | 46               | 0                   | 12                    | 39                  | 90                  | 1                   | 130                 |
| FRAMOFF <sup>10</sup>   | 1                 | 3296                        | 1498 (45%)  | 55.3 (9.7)          | 11.6 (4.2, 14.3)                           | 0.60 (1.46)                                           | 121                        | 13         | 108          | 0        | 68                         | 7                   | 60               | 0                   | 6                     | 19                  | 194                 | 32                  | 245                 |
| GOH <sup>11</sup>       | 1                 | 567                         | 277 (49%)   | 70.6 (6.6)          | 3.9 (0.3, 6.9)                             | 0.90 (0.96)                                           | 0                          | 0          | 0            | 0        | 0                          | 0                   | 0                | 0                   | 0                     | 0                   | 0                   | 16                  | 16                  |
| GOTOW <sup>12</sup>     | 1                 | 36                          | 0 (0%)      | 48.9 (7.9)          | 20.4 (0.5, 32.6)                           | 2.41 (0.74)                                           | 7                          | 4          | 3            | 4        | 7                          | 0                   | 0                | 7                   | 3                     | 9                   | 9                   | 0                   | 18                  |
| HELSINAG <sup>13</sup>  | 1                 | 391                         | 105 (27%)   | 79.5 (4.4)          | 7.9 (1.7, 11.0)                            | 0.56 (1.21)                                           | 38                         | 38         | 0            | 27       | 43                         | 2                   | 20               | 4                   | 22                    | 103                 | 117                 | 15                  | 235                 |
| HISAYAMA <sup>14</sup>  | 1                 | 2578                        | 1088 (42%)  | 59.0 (11.5)         | 14.2 (3.4, 14.2)                           | -0.68 (1.28)                                          | 77                         | 10         | 67           | 3        | 220                        | 49                  | 148              | 0                   | 59                    | 76                  | 311                 | 2                   | 389                 |
| HOORN <sup>15</sup>     | 1                 | 531                         | 254 (48%)   | 63.9 (7.2)          | 8.7 (2.7, 9.9)                             | 0.43 (1.24)                                           | 19                         | 4          | 15           | 3        | 13                         | 0                   | 2                | 11                  | 15                    | 22                  | 30                  | 21                  | 73                  |
| KIHD <sup>16</sup>      | 1                 | 2040                        | 2040 (100%) | 52.5 (5.3)          | 19.2 (3.0, 23.1)                           | 0.27 (0.96)                                           | 394                        | 11         | 383          | 6        | 146                        | 34                  | 106              | 3                   | 26                    | 46                  | 257                 | 1                   | 304                 |
| LASA <sup>17</sup>      | 1                 | 1518                        | 689 (45%)   | 69.7 (8.4)          | 9.7 (1.6, 10.4)                            | 0.77 (1.18)                                           | 25                         | 0          | 25           | 0        | 14                         | 0                   | 0                | 14                  | 0                     | 0                   | 0                   | 428                 | 428                 |
| MESA <sup>18</sup>      | 1                 | 6716                        | 3170 (47%)  | 62.2 (10.2)         | 4.8 (2.5, 5.2)                             | 0.65 (1.16)                                           | 83                         | 14         | 69           | 0        | 84                         | 13                  | 68               | 2                   | 6                     | 21                  | 120                 | 1                   | 142                 |
| MOGERAUG1 <sup>19</sup> | 1                 | 874                         | 874 (100%)  | 53.9 (5.8)          | 12.9 (3.6, 13.4)                           | 0.47 (1.14)                                           | 79                         | 32         | 47           | 26       | 5                          | 2                   | 0                | 2                   | 24                    | 61                  | 65                  | 0                   | 126                 |
| MOGERAUG2               | 1                 | 1265                        | 1265 (100%) | 58.7 (8.4)          | 7.8 (1.3, 8.4)                             | 0.52 (1.14)                                           | 74                         | 34         | 40           | 28       | 3                          | 1                   | 0                | 1                   | 8                     | 45                  | 66                  | 2                   | 113                 |
| MOGERAUG3               | 1                 | 3152                        | 1596 (51%)  | 54.9 (10.4)         | 3.0 (2.0, 3.6)                             | 0.42 (1.09)                                           | 16                         | 5          | 11           | 5        | 4                          | 1                   | 2                | 1                   | 9                     | 18                  | 27                  | 0                   | 45                  |
| MOSWEGOT <sup>20</sup>  | 1                 | 745                         | 362 (49%)   | 49.0 (9.5)          | 8.7 (7.6, 9.2)                             | 0.69 (1.23)                                           | 8                          | 1          | 7            | 1        | 16                         | 4                   | 8                | 2                   | 1                     | 5                   | 21                  | 0                   | 26                  |
| NHANESIII <sup>21</sup> | 1                 | 3722                        | 1434 (39%)  | 55.6 (15.6)         | 8.2 (3.0, 11.2)                            | 1.99 (0.70)                                           | 137                        | 137        | 0            | 49       | 58                         | 0                   | 0                | 58                  | 67                    | 262                 | 391                 | 2                   | 655                 |
| NPHSII <sup>22</sup>    | 1                 | 2637                        | 2637 (100%) | 57.2 (3.6)          | 7.6 (3.1, 9.9)                             | 1.09 (1.18)                                           | 166                        | 16         | 150          | 13       | 38                         | 3                   | 23               | 8                   | 22                    | 41                  | 120                 | 1                   | 162                 |
| NSHS <sup>23</sup>      | 1                 | 1448                        | 695 (48%)   | 53.8 (15.0)         | 9.7 (2.4, 10.0)                            | 0.52 (1.32)                                           | 5                          | 5          | 0            | 0        | 30                         | 0                   | 0                | 30                  | 0                     | 5                   | 9                   | 0                   | 14                  |
| QUEBEC <sup>24</sup>    | 1                 | 1913                        | 1913 (100%) | 56.3 (6.9)          | 5.3 (4.6, 5.6)                             | 0.56 (1.13)                                           | 40                         | 5          | 35           | 4        | 9                          | 0                   | 0                | 9                   | 12                    | 17                  | 45                  | 2                   | 64                  |
| RANCHO <sup>25</sup>    | 1                 | 1381                        | 578 (42%)   | 67.0 (11.1)         | 14.6 (2.0, 17.8)                           | 0.51 (1.11)                                           | 161                        | 1          | 160          | 1        | 131                        | 1                   | 0                | 127                 | 71                    | 76                  | 274                 | 1                   | 351                 |
| ROTT <sup>26</sup>      | 1                 | 4825                        | 1824 (38%)  | 67.7 (8.2)          | 12.0 (2.9, 14.2)                           | 0.53 (1.04)                                           | 249                        | 35         | 214          | 30       | 146                        | 23                  | 39               | 64                  | 275                   | 456                 | 796                 | 181                 | 1433                |
| SHS <sup>27</sup>       | 1                 | 3194                        | 1157 (36%)  | 59.7 (7.9)          | 8.9 (1.7, 10.3)                            | 1.38 (1.00)                                           | 286                        | 90         | 196          | 38       | 133                        | 5                   | 4                | 120                 | 76                    | 189                 | 503                 | 8                   | 700                 |
| SPEED <sup>28</sup>     | 1                 | 1576                        | 1576 (100%) | 57.7 (4.4)          | 13.9 (2.8, 15.3)                           | 0.42 (1.14)                                           | 154                        | 90         | 64           | 78       | 56                         | 2                   | 46               | 5                   | 12                    | 115                 | 194                 | 0                   | 309                 |
| TARFS <sup>29</sup>     | 1                 | 2006                        | 979 (49%)   | 51.6 (11.1)         | 4.5 (0.9, 8.2)                             | 0.85 (1.23)                                           | 39                         | 28         | 11           | 8        | 20                         | 0                   | 1                | 19                  | 17                    | 60                  | 48                  | 3                   | 111                 |
| ULSAM <sup>30</sup>     | 1                 | 1014                        | 1014 (100%) | 71.4 (1.7)          | 12.1 (2.1, 14.9)                           | 0.66 (1.01)                                           | 145                        | 47         | 98           | 19       | 111                        | 16                  | 83               | 7                   | 38                    | 88                  | 199                 | 2                   | 289                 |
| WHITEI                  | 1                 | 3954                        | 3954 (100%) | 76.4 (4.6)          | 8.2 (2.0, 8.4)                             | 0.52 (1.11)                                           | 209                        | 209        | 0            | 92       | 137                        | 14                  | 20               | 71                  | 111                   | 457                 | 743                 | 14                  | 1214                |
| WHITEII <sup>31</sup>   | 1                 | 7496                        | 5201 (69%)  | 49.5 (6.0)          | 7.6 (3.8, 8.2)                             | -0.09 (1.18)                                          | 161                        | 23         | 138          | 18       | 6                          | 0                   | 1                | 3                   | 11                    | 40                  | 95                  | 1                   | 136                 |
| WHS <sup>32</sup>       | 1                 | 27938                       | 0 (0%)      | 54.7 (7.1)          | 10.2 (8.4, 10.8)                           | 0.62 (1.21)                                           | 249                        | 10         | 239          | 4        | 284                        | 26                  | 237              | 2                   | 82                    | 96                  | 544                 | 0                   | 640                 |
| Subtotal                | 35                | 114802                      | 47935 (42%) | 60.3 (8.6)          | 8.2 (2.0, 14.2)                            | 0.65 (1.12)                                           | 4185                       | 1262       | 2923         | 776      | 2878                       | 338                 | 1533             | 837                 | 1205                  | 3040                | 7223                | 820                 | 11083               |

| Study design/ Study                        | Number of cohorts | Total No. with CRP measured | Males (%)    | Age (yrs) mean (SD) | Follow up (yrs) median (5, 95) percentiles | Log <sub>e</sub> CRP (log <sub>e</sub> mg/l) mean(sd) | Non-fatal MI and CHD death | CHD deaths | Non-fatal MI | Fatal MI | All cerebrovascular events | Haemorrhagic stroke | Ischaemic stroke | Unclassified stroke | Other vascular deaths | All vascular deaths | Non-vascular deaths | Unclassified deaths | All-cause mortality |
|--------------------------------------------|-------------------|-----------------------------|--------------|---------------------|--------------------------------------------|-------------------------------------------------------|----------------------------|------------|--------------|----------|----------------------------|---------------------|------------------|---------------------|-----------------------|---------------------|---------------------|---------------------|---------------------|
| Case-cohort                                |                   |                             |              |                     |                                            |                                                       |                            |            |              |          |                            |                     |                  |                     |                       |                     |                     |                     |                     |
| ARIC <sup>33</sup>                         | 1                 | 1183                        | 687 (58%)    | 58.6 (5.5)          | 10.8 (1.8, 12.7)                           | 0.67 (1.11)                                           | 249                        | 36         | 213          | 21       | 44                         | 1                   | 39               | 2                   | 19                    | 57                  | 71                  | 1                   | 129                 |
| FINRISK <sup>92</sup> <sup>34</sup>        | 1                 | 864                         | 459 (53%)    | 51.8 (9.2)          | 11.8 (1.8, 11.9)                           | 0.62 (1.15)                                           | 97                         | 20         | 77           | 8        | 80                         | 21                  | 56               | 0                   | 13                    | 36                  | 112                 | 1                   | 149                 |
| Subtotal                                   | 2                 | 2047                        | 1146 (56%)   | 55.2 (7.3)          | 11.2 (1.8, 12.6)                           | 0.65 (1.13)                                           | 346                        | 56         | 290          | 29       | 124                        | 22                  | 95               | 2                   | 32                    | 93                  | 183                 | 2                   | 278                 |
| Nested case-control (frequency matched)    |                   |                             |              |                     |                                            |                                                       |                            |            |              |          |                            |                     |                  |                     |                       |                     |                     |                     |                     |
| BRHS <sup>35</sup>                         | 1                 | 1298                        | 1298 (100%)  | 51.9 (5.3)          | 20.5 (3.2, 23.6)                           | 0.50 (1.22)                                           | 456                        | 189        | 267          | 128      | 68                         | 0                   | 2                | 62                  | 24                    | 233                 | 178                 | 1                   | 412                 |
| REYK <sup>36</sup>                         | 1                 | 5457                        | 3880 (71%)   | 54.4 (8.3)          | 21.3 (4.1, 36.6)                           | 0.31 (1.12)                                           | 2009                       | 751        | 1258         | 552      | 334                        | 64                  | 102              | 92                  | 212                   | 1297                | 1503                | 31                  | 2831                |
| Subtotal                                   | 2                 | 6755                        | 5178 (77%)   | 53.2 (7.8)          | 21.2 (3.8, 35.3)                           | 0.40 (1.14)                                           | 2465                       | 940        | 1525         | 680      | 402                        | 64                  | 104              | 154                 | 236                   | 1530                | 1681                | 32                  | 3243                |
| Nested case-control (individually matched) |                   |                             |              |                     |                                            |                                                       |                            |            |              |          |                            |                     |                  |                     |                       |                     |                     |                     |                     |
| EPICNOR <sup>37</sup>                      | 1                 | 3316                        | 2105 (63%)   | 65.3 (7.8)          | 7.5 (3.4, 9.3)                             | 0.59 (1.18)                                           | 481                        | 228        | 253          | 4        | 0                          | 0                   | 0                | 0                   | 19                    | 247                 | 105                 | 0                   | 352                 |
| FIA <sup>38</sup>                          | 1                 | 1612                        | 1176 (73%)   | 54.9 (7.6)          | 3.5 (0.4, 8.5)                             | 0.44 (1.04)                                           | 583                        | 123        | 460          | 123      | 0                          | 0                   | 0                | 0                   | 0                     | 123                 | 0                   | 0                   | 123                 |
| FLETCHER <sup>39</sup>                     | 1                 | 620                         | 478 (77%)    | 56.9 (14.4)         | 5.5 (2.1, 6.4)                             | 0.20 (1.01)                                           | 128                        | 0          | 0            | 0        | 0                          | 0                   | 0                | 0                   | 0                     | 0                   | 0                   | 0                   | 0                   |
| GLOSTRUP <sup>40</sup>                     | 1                 | 382                         | 281 (74%)    | 50.3 (8.5)          | 4.5 (0.5, 12.5)                            | 0.58 (1.03)                                           | 75                         | 17         | 58           | 17       | 0                          | 0                   | 0                | 0                   | 0                     | 17                  | 0                   | 0                   | 17                  |
| HPFS <sup>41</sup>                         | 1                 | 730                         | 730 (100%)   | 63.1 (8.3)          | 7.7 (3.0, 8.5)                             | 0.28 (1.17)                                           | 221                        | 37         | 184          | 11       | 7                          | 3                   | 2                | 1                   | 34                    | 78                  | 20                  | 0                   | 98                  |
| MRFIT <sup>42</sup>                        | 1                 | 737                         | 737 (100%)   | 46.5 (5.6)          | 7.1 (6.0, 7.8)                             | 0.70 (0.79)                                           | 246                        | 148        | 98           | 13       | 0                          | 0                   | 0                | 0                   | 0                     | 19                  | 5                   | 0                   | 24                  |
| NHS <sup>43</sup>                          | 1                 | 720                         | 0 (0%)       | 60.4 (6.5)          | 8.0 (1.3, 8.8)                             | 0.89 (1.16)                                           | 238                        | 30         | 208          | 30       | 0                          | 0                   | 0                | 0                   | 3                     | 33                  | 11                  | 1                   | 45                  |
| PRIME <sup>44</sup>                        | 1                 | 916                         | 916 (100%)   | 55.2 (2.8)          | 5.2 (1.9, 7.3)                             | 0.40 (1.10)                                           | 143                        | 17         | 126          | 12       | 6                          | 2                   | 4                | 0                   | 14                    | 31                  | 3                   | 0                   | 34                  |
| USPHS <sup>45</sup>                        | 1                 | 938                         | 938 (100%)   | 59.6 (9.1)          | -                                          | 0.20 (0.94)                                           | 246                        | 22         | 224          | 22       | 154                        | 0                   | 154              | 0                   | 0                     | 27                  | 0                   | 0                   | 27                  |
| WHIHABPS <sup>46</sup>                     | 1                 | 1548                        | 0 (0%)       | 68.5 (6.3)          | 6.8 (1.2, 9.3)                             | 1.01 (1.13)                                           | 49                         | 6          | 43           | 0        | 706                        | 0                   | 706              | 0                   | 1                     | 12                  | 24                  | 2                   | 38                  |
| Subtotal                                   | 10                | 11519                       | 7361 (64%)   | 58.1 (7.8)          | 6.6 (1.4, 9.0)                             | 0.53 (1.09)                                           | 2410                       | 628        | 1654         | 232      | 873                        | 5                   | 866              | 1                   | 71                    | 587                 | 168                 | 3                   | 758                 |
| Clinical trials                            |                   |                             |              |                     |                                            |                                                       |                            |            |              |          |                            |                     |                  |                     |                       |                     |                     |                     |                     |
| AFTCAPS <sup>47</sup>                      | 1                 | 5398                        | 4589 (85%)   | 58.3 (7.2)          | 5.1 (4.5, 6.7)                             | 0.55 (1.03)                                           | 102                        | 3          | 99           | 3        | 17                         | 0                   | 16               | 1                   | 14                    | 18                  | 23                  | 0                   | 41                  |
| LEADER <sup>48</sup>                       | 1                 | 434                         | 434 (100%)   | 67.1 (9.1)          | 3.8 (0.8, 4.9)                             | 1.51 (0.93)                                           | 36                         | 25         | 11           | 13       | 24                         | 0                   | 15               | 9                   | 7                     | 37                  | 30                  | 3                   | 70                  |
| PROSPER <sup>49</sup>                      | 1                 | 3179                        | 1320 (42%)   | 75.1 (3.3)          | 3.2 (1.1, 3.8)                             | 1.12 (1.12)                                           | 261                        | 64         | 197          | 0        | 112                        | 0                   | 0                | 112                 | 13                    | 86                  | 150                 | 0                   | 236                 |
| USPHS2 <sup>50</sup>                       | 1                 | 10724                       | 10724 (100%) | 63.7 (7.7)          | 10.9 (4.9, 11.5)                           | -0.11 (1.06)                                          | 311                        | 28         | 283          | 2        | 259                        | 40                  | 217              | 2                   | 75                    | 105                 | 690                 | 0                   | 795                 |
| WOSCOPS <sup>51</sup>                      | 1                 | 5451                        | 5451 (100%)  | 55.1 (5.5)          | 4.8 (2.9, 6.0)                             | 0.53 (1.07)                                           | 335                        | 64         | 271          | 0        | 62                         | 0                   | 0                | 62                  | 6                     | 70                  | 88                  | 0                   | 158                 |
| Subtotal                                   | 5                 | 25186                       | 22518 (89%)  | 63.9 (6.8)          | 5.6 (3.0, 11.4)                            | 0.72 (1.06)                                           | 1045                       | 184        | 861          | 18       | 474                        | 40                  | 248              | 186                 | 115                   | 316                 | 981                 | 3                   | 1300                |
| Total                                      | 54                | 160309                      | 84138 (52%)  | 59.8 (8.2)          | 8.0 (2.0, 15.1)                            | 0.62 (1.11)                                           | 10451                      | 3070       | 7253         | 1735     | 4751                       | 469                 | 2846             | 1180                | 1659                  | 5566                | 10236               | 860                 | 16662               |

**eTable 2. Study level characteristics and laboratory methods for measurement of CRP.**

| Study                  | Geographical location | Population source/sampling method        | Fasting status at blood sampling/duration | Sample source | Time between collection and measurement | Sample state before analysis, storage temperature (°C) if frozen | Assay method (source) | Assay standard | Assay source |
|------------------------|-----------------------|------------------------------------------|-------------------------------------------|---------------|-----------------------------------------|------------------------------------------------------------------|-----------------------|----------------|--------------|
| AFTCAPS <sup>†</sup>   | USA                   | Popln. Screening/Complete                | Fasted / > 8 hrs                          | Serum         | < 1 week                                | NS                                                               | EIA (Behring)         | Manufacturer   | Commercial   |
| ARIC                   | USA                   | Household listings/Random                | Fasted / > 8 hrs                          | Plasma        | > 10 yrs                                | Frozen, -70                                                      | ITA (Denka Seiken)    | Manufacturer   | Commercial   |
| ATTICA                 | Greece                | Popln. Register/Random                   | Fasted / >8hrs                            | Serum         | < 1 week                                | Fresh                                                            | INA ( Behring)        | Manufacturer   | Commercial   |
| BRHS                   | UK                    | GP lists/Random                          | Non-fasted                                | Serum         | > 10 yrs                                | Frozen, -20                                                      | MEIA (Abbott)         | WHO 85/506     | Commercial   |
| BRUN <sup>†</sup>      | Italy                 | Popln. Register/Random                   | Fasted / > 8 hrs                          | Plasma        | > 10 yrs                                | Frozen, -70                                                      | ITA / INA, Behring    | IFCC CRM 470   | Commercial   |
| BWHHS                  | UK                    | Popln. Register/Random                   | Fasted / >8 hrs                           | Serum         | 1-5 yrs                                 | Frozen, -80                                                      | INA ( Behring)        | Manufacturer   | Commercial   |
| CAPS                   | UK                    | Electoral rolls/Random                   | Fasted / > 8 hrs                          | Plasma        | NS                                      | Frozen, -70                                                      | EIA (Behring)         | WHO 85/506     | Commercial   |
| CHS <sup>†</sup>       | USA                   | Medicare lists/Random                    | Fasted / > 8 hrs                          | Plasma        | 5-10 yrs                                | Frozen, -70                                                      | ELISA (In-house)      | WHO 85/506     | In-house     |
| COPEN <sup>†</sup>     | Denmark               | Popln. Register/Random                   | Non-fasted                                | Serum         | > 10 yrs                                | Frozen, -80                                                      | ITA (DAKO)            | Manufacturer   | Commercial   |
| EAS                    | Scotland              | GP list/Random                           | Fasted/> 8 hrs                            | Serum         | > 10 yrs                                | Frozen, -50                                                      | INA ( Behring)        | Manufacturer   | Commercial   |
| EPICNOR                | UK                    | GP lists/Complete                        | Non-fasted                                | Serum         | NS                                      | Frozen, -80                                                      | ELISA (Sanquin Res)   | Behringwerke   | Commercial   |
| ESTHER                 | Germany               | GP list/Complete                         | Fasted/ NS                                | Serum         | 1 week-1 yr                             | Frozen, -80                                                      | ITA (ADIVA)           | Manufacturer   | Commercial   |
| FIA <sup>†</sup>       | Sweden                | Popln. Register/Random                   | Fasted / 4 hrs                            | Plasma        | 5 – 18 yrs                              | Frozen, -80                                                      | CIA (Immulate )       | WHO 85/506     | Commercial   |
| FINRISK92              | Finland               | Popln. Register/Random                   | Fasted / 4-8 hrs                          | Serum         | > 10 yrs                                | Frozen, -20                                                      | CIA (Immulate )       | Manufacturer   | Commercial   |
| FINRISK97              | Finland               | Popln. Register/Random                   | Fasted / 4-8 hrs                          | Serum         | 1 week - 1 yr                           | Frozen, -70                                                      | ELISA, Eucardio Lab   | Manufacturer   | Commercial   |
| FLETCHER <sup>†</sup>  | New Zealand           | Occup. , electoral roll/Complete, random | Non-fasted                                | Plasma        | > 10 yrs                                | Frozen, -70                                                      | INA (Behring)         | Manufacturer   | Commercial   |
| FRAMOFF <sup>†</sup>   | USA                   | Offspring & spouse to FHS/Complete       | Fasted / > 8 hrs                          | Serum         | 3 - 7 yrs                               | Frozen, -70                                                      | ELISA (Hemagen)       | WHO            | Commercial   |
| GLOSTRUP               | Denmark               | Popln. Register/Random                   | Fasted / > 8 hrs                          | Serum         | 7-15 yrs                                | Frozen, -20                                                      | ELISA (In-house)      | Behring        | In-house     |
| GOH                    | Israel                | Popln. Register/Random                   | Fasted / > 8 hrs                          | Plasma        | < 1 week                                | Fresh                                                            | Olympus               | Manufacturer   | Commercial   |
| GOTOW <sup>‡</sup>     | Sweden                | Popln. Register/Random                   | Fasted / > 8 hrs                          | Serum         | NS                                      | NS                                                               | NS                    | NS             | NS           |
| HELSINAG               | Finland               | Popln. Register/Random                   | Fasted / > 8 hrs                          | Serum         | 5-10 yrs                                | Frozen, -20                                                      | EIA (Medix Diacor)    | WHO 85/506     | Commercial   |
| HISAYAMA               | Japan                 | Popln. Register/Complete                 | Fasted / > 8 hrs                          | Serum         | > 10 yrs                                | Frozen, -20                                                      | INA ( Behring)        | Manufacturer   | Commercial   |
| HOORN                  | Netherlands           | Popln. Register/Random                   | Fasted / >8 hrs                           | Plasma        | 5-10 yrs                                | Frozen, -70                                                      | ELISA (DAKO)          | Behring        | Commercial   |
| HPFS                   | USA                   | Occupational/Complete                    | 2/3 Fasted / NS                           | Plasma        | 5-10 yrs                                | Frozen, -130                                                     | ITA (Denka Seiken)    | Denka Seiken   | Commercial   |
| KIHD                   | Finland               | Popln. Register/Random                   | Fasted / > 8 hrs                          | Serum         | > 10 yrs                                | Frozen, -20                                                      | CIA (Immulate )       | WHO 85/506     | Commercial   |
| LASA <sup>†</sup>      | Netherlands           | Popln. Register/Random                   | Non-fasted                                | Serum         | 5 - 10 yrs                              | Frozen, -80                                                      | ELISA (In-house)      | In-house       | In-house     |
| LEADER <sup>†</sup>    | UK                    | GP listings/Complete                     | Non-fasted                                | Serum         | NS                                      | Frozen, -70                                                      | CIA (Immulate )       | NS             | Commercial   |
| MESA <sup>†</sup>      | USA                   | Popln. Register/Random                   | Fasted / > 8 hrs                          | Plasma        | 1 week - 1 yr                           | Frozen, -70                                                      | INA (Behring)         | CDC            | Commercial   |
| MOGERAUG1 <sup>†</sup> | Germany               | Popln. Register/Random                   | Non-fasted                                | Serum         | > 10 yrs                                | Frozen, -80                                                      | IRMA, In-house        | WHO 85/506     | In-house     |
| MOGERAUG2              | Germany               | Popln. Register/Random                   | Non-fasted                                | Serum         | > 10 yrs                                | Frozen, -80                                                      | IRMA, In-house        | WHO 85/506     | In-house     |
| MOGERAUG3              | Germany               | Popln. Register/Random                   | Non-fasted                                | Serum         | 1-5 yrs                                 | Frozen, -80                                                      | IRMA, In-house        | WHO 85/506     | In-house     |
| MOSWEGOT               | Sweden                | Popln. Register/Random                   | Fasted / > 8 hrs                          | Serum         | NS                                      | NS                                                               | NS                    | NS             | NS           |
| MRFIT                  | USA                   | Popln. Screening/Complete                | Fasted / > 8 hrs                          | Plasma        | 10 yrs                                  | Frozen, -50                                                      | ELISA (Calbiochem)    | WHO 85/506     | Commercial   |
| NHANESIII <sup>‡</sup> | USA                   | Census list/Cluster                      | Fasted / > 6 hrs                          | Serum         | 1 week – 1 yr                           | Frozen, -70                                                      | INA, Behring          | Manufacturer   | Commercial   |
| NHS                    | USA                   | Occupational/Complete                    | Fasted / Variable                         | Plasma        | 5-10 yrs                                | Frozen, -130                                                     | ITA (Denka Seiken)    | Denka Seiken   | Commercial   |
| NPHSII                 | UK                    | GP list/Complete                         | Non-fasted                                | Serum         | 7-14 years                              | Frozen, -40                                                      | ? (Cordia)            | NS             | Commercial   |

| Study              | Geographical location        | Population source/sampling method | Fasting status at blood sampling/duration | Sample source | Time between collection and measurement | Sample state before analysis, storage temperature (°C) if frozen | Assay method (source) | Assay standard  | Assay source |
|--------------------|------------------------------|-----------------------------------|-------------------------------------------|---------------|-----------------------------------------|------------------------------------------------------------------|-----------------------|-----------------|--------------|
| NSHS               | Canada                       | Medicare lists/Random             | Fasted / > 8 hrs                          | Plasma        | > 10 yrs                                | Frozen, -80                                                      | INA (Behring)         | NS              | Commercial   |
| PRIME              | France / Northern Ireland    | General Popln./Quota              | Fasted / > 8 hrs                          | Plasma        | 5-10 yrs                                | Frozen, -130                                                     | INA (Behring)         | NS              | Commercial   |
| PROSPER            | Scotland/Ireland/Netherlands | Primary Care screening/Complete   | Fasted / >8 hrs                           | Plasma        | 1-5 yrs                                 | Frozen, -80                                                      | ITA (Roche)           | cFas calibrator | Commercial   |
| QUEBEC             | Canada                       | Popln. Register/Random            | Fasted / > 8 hrs                          | Plasma        | 5-10 yrs                                | Frozen, -70                                                      | INA (Behring)         | Manufacturer    | Commercial   |
| RANCHO             | USA                          | Household listings/Complete       | Fasted / > 8 hrs                          | Plasma        | > 10 yrs                                | Frozen, -70                                                      | INA (Behring)         | NS              | Commercial   |
| REYK               | Iceland                      | Popln. Register/Complete          | Fasted / > 8 hrs                          | Serum         | NS                                      | Frozen, -20                                                      | ITA (Roche)           | WHO 85/506      | Commercial   |
| ROTT <sup>‡</sup>  | Netherlands                  | Popln. Register/Complete          | Non-fasted                                | Serum         | > 10 yrs                                | Frozen, -20                                                      | INA (Immage)          | Manufacturer    | Commercial   |
| SHS                | USA                          | Tribal rolls/Complete             | Fasted / > 8 hrs                          | Plasma        | NS                                      | Frozen, -80                                                      | ELISA (In-house)      | In-house        | In-house     |
| SPEED              | UK                           | GP list/Complete                  | Fasted / >8hrs                            | Plasma        | NS                                      | Frozen, -20                                                      | EIA (Behring)         | WHO 85/506      | Commercial   |
| TARFS <sup>‡</sup> | Turkey                       | Household listings/Random         | Fasted / > 8 hrs                          | Plasma        | < 1 week                                | Frozen, -80                                                      | INA (Behring)         | Manufacturer    | Commercial   |
| ULSAM <sup>†</sup> | Sweden                       | Popln. Register/Complete          | Fasted / > 8 hrs                          | Serum         | >10 yrs                                 | Frozen, -150                                                     | INA (Behring)         | NS              | Commercial   |
| USPHS              | USA                          | Occupational/Complete             | Non-fasted                                | Plasma        | > 10 yrs                                | Frozen, -80                                                      | ELISA (In-house)      | WHO 85/506      | In-house     |
| USPHS2             | USA                          | Occupational/Complete             | Fasted / >8hrs                            | Plasma        | NS                                      | NS                                                               | ELISA (In-house)      | WHO 85/506      | In-house     |
| WHIHABPS           | USA                          | Popln. Register/Complete          | Fastes/NS                                 | Plasma        | 7-12 yrs                                | Frozen, -70                                                      | ITA (Denka Seiken)    | NS              | Commercial   |
| WHITEI             | UK                           | Occupational/Complete             | Fasted / > 8 hrs                          | Plasma        | NS                                      | Frozen, -150                                                     | INA (Behring)         | Manufacturer    | Commercial   |
| WHITEII            | UK                           | Civil servant/Complete            | Fasted /NS                                | Serum         | NS                                      | Frozen, -80                                                      | INA (Behring)         | NS              | Commercial   |
| WHS                | USA                          | Health professionals/Complete     | 3/4 Fasted / >8 hrs                       | Plasma        | 5-10 yrs                                | Frozen, -130                                                     | ITA (Denka Seiken)    | NS              | Commercial   |
| WOSCOPS            | UK                           | Heart screening clinic/Complete   | Fasted / > 8 hrs                          | Plasma        | 10 yrs                                  | Frozen, -70                                                      | ELISA (In-house)      | IFCC CRM470     | In-house     |

<sup>‡</sup>These studies used a non-high sensitivity CRP assay, measuring only CRP values > 2 mg/l

<sup>†</sup>These studies have contributed data on baseline and re-survey measurements

Popln. = Population; Occup./Occupational = Occupation based cohort; GP = General Practitioner; FHS = Framingham Heart Study; NS = Not Stated

**eTable 3. Characterisation of baseline and incident vascular disease outcomes in the contributing studies.**

| Study     | Coronary heart disease assessed at baseline |        |                            |               | Definition of incident endpoints |                  |     |                 |                  |                | Classification of incident endpoints |          |        |          |             |      |              |
|-----------|---------------------------------------------|--------|----------------------------|---------------|----------------------------------|------------------|-----|-----------------|------------------|----------------|--------------------------------------|----------|--------|----------|-------------|------|--------------|
|           | MI                                          | Angina | Coronary revascularization | Heart failure | Death                            | Nonfatal MI      |     |                 | Nonfatal Stroke  |                | MI                                   |          |        | Stroke   |             |      |              |
|           |                                             |        |                            |               |                                  | Clinical feature | ECG | Cardiac markers | Clinical feature | CT/MRI imaging | Definite                             | Probable | Silent | Ischemic | Hemorrhagic | SAH  | Unclassified |
| AFTCAPS   | ++                                          | ++     | -                          | -             | **                               | ✓                | ✓   | ✓               | ✓                | ✓              | ✓                                    | -        | ✓ NC   | ✓ NC     | NS          | NS   | ✓ NC         |
| ARIC      | ++ NC                                       | ++ NC  | ++ NC                      | -             | **                               | ✓                | ✓   | ✓               | ✓                | ✓              | ✓                                    | ✓ NC     | ✓ NC   | ✓        | ✓           | ✓    | ✓            |
| ATTICA    | +                                           | +      | +                          | +             | *                                | -                | -   | -               | -                | -              | -                                    | -        | -      | -        | -           | -    | -            |
| BRHS      | ++                                          | ++     | -                          | ++            | *                                | ✓                | ✓   | ✓               | NS               | NS             | ✓                                    | o        | o      | ✓        | ✓           | ✓    | ✓            |
| BRUN      | ++                                          | ++     | ++ NC                      | ++ NC         | **                               | ✓                | ✓   | ✓               | ✓                | ✓              | ✓                                    | o        | o      | ✓        | ✓           | o    | o            |
| BWHHS     | ++                                          | ++     | ++                         | -             | **                               | ✓                | ✓   | ✓               | ✓                | ✓              | ✓                                    | o        | o      | ✓        | ✓           | ✓    | ✓            |
| CAPS      | ++                                          | ++ NC  | -                          | -             | **                               | ✓                | ✓   | o               | ✓                | ✓              | ✓                                    | ✓ NC     | o      | ✓        | ✓           | ✓    | ✓            |
| CHS       | ++                                          | ++     | ++                         | ++            | **                               | ✓                | ✓   | ✓               | ✓                | ✓              | ✓                                    | ✓ NC     | ✓ NC   | ✓        | ✓           | o    | ✓            |
| COPEN     | ++                                          | ++     | -                          | -             | **                               | ✓                | ✓   | ✓               | ✓                | ✓              | ✓                                    | o        | o      | ✓        | ✓           | ✓    | ✓            |
| EAS       | ++                                          | ++     | -                          | -             | **                               | ✓                | ✓   | ✓               | ✓                | ✓              | ✓                                    | ✓        | ✓ NC   | ✓        | ✓           | ✓    | ✓            |
| EPICNOR   | +                                           | -      | -                          | -             | *                                | ✓                | ✓   | ✓               | ✓                | ✓              | ✓                                    | o        | o      | ✓ NC     | ✓ NC        | ✓ NC | ✓ NC         |
| ESTHER    | ++                                          | ++     | ++                         | +             | **                               | ✓                | ✓   | ✓               | ✓                | ✓              | ✓                                    | o        | o      | o        | o           | o    | ✓            |
| FIA       | ++                                          | -      | -                          | -             | **                               | ✓                | ✓   | ✓               | NA               | NA             | ✓                                    | o        | o      | ✓ NC     | ✓ NC        | ✓ NC | ✓ NC         |
| FINRISK92 | ++                                          | ++     | ++ NC                      | -             | **                               | ✓                | ✓   | ✓               | ✓                | ✓              | ✓                                    | o        | o      | ✓        | ✓           | ✓    | ✓            |
| FINRISK97 | ++                                          | ++     | ++ NC                      | -             | **                               | ✓                | ✓   | ✓               | ✓                | ✓              | ✓                                    | o        | o      | ✓        | ✓           | ✓    | ✓            |
| FLETCHER  | + NC                                        | +      | + NC                       | -             | *                                | ✓                | ✓   | ✓               | ✓                | ✓              | ✓                                    | o        | o      | ✓ NC     | ✓ NC        | ✓ NC | ✓ NC         |
| FRAMOFF   | ++                                          | ++     | -                          | ++ NC         | **                               | ✓                | ✓   | ✓               | ✓                | ✓              | ✓                                    | o        | ✓      | ✓        | ✓           | ✓    | ✓            |
| GLOSTRUP  | ++                                          | ++     | ++ NC                      | -             | **                               | ✓                | ✓   | ✓               | NA               | NA             | ✓                                    | o        | o      | o        | o           | o    | ✓ NC         |
| GOH       | ++                                          | -      | -                          | -             | **                               | NA               | NA  | NA              | NA               | NA             | ✓                                    | ✓ NC     | o      | ✓        | ✓           | ✓    | ✓            |
| GOTOW     | ++                                          | NS     | NS                         | NS            | *                                | ✓                | ✓   | ✓               | ✓                | ✓              | ✓                                    | o        | o      | NS       | NS          | NS   | ✓            |
| HELSINAG  | ++ NC                                       | ++ NC  | ++ NC                      | ++ NC         | **                               | NA               | NA  | NA              | NA               | NA             | ✓                                    | o        | o      | ✓        | ✓           | ✓    | ✓            |
| HISAYAMA  | ++                                          | ++     | ++                         | ++            | **                               | ✓                | ✓   | ✓               | ✓                | ✓              | ✓                                    | o        | ✓      | ✓        | ✓           | ✓    | ✓            |
| HOORN     | ++ NC                                       | ++ NC  | ++ NC                      | NS            | *                                | ✓                | ✓   | ✓               | ✓                | o              | ✓                                    | o        | o      | ✓        | ✓           | ✓    | ✓            |
| HPFS      | +                                           | +      | +                          | -             | **                               | ✓                | ✓   | ✓               | NA               | NA             | ✓                                    | ✓ NC     | o      | o        | o           | o    | o            |
| KIHD      | ++                                          | ++     | ++                         | ++            | **                               | ✓                | ✓   | ✓               | ✓                | ✓              | ✓                                    | ✓ NC     | o      | ✓        | ✓           | ✓    | ✓            |
| LASA      | ++                                          | ++     | -                          | ++            | *                                | NA               | NA  | NA              | ✓                | ✓              | o                                    | o        | o      | o        | o           | o    | ✓            |
| LEADER    | ++                                          | ++     | -                          | -             | **                               | ✓                | ✓   | ✓               | ✓                | ✓              | ✓                                    | o        | o      | ✓        | ✓           | ✓    | ✓            |
| MESA      | +                                           | +      | +                          | +             | **                               | ✓                | ✓   | ✓               | ✓                | ✓              | ✓                                    | NS       | ✓      | ✓        | ✓           | ✓    | ✓            |
| MOGERAUG1 | +                                           | + NC   | -                          | -             | **                               | ✓                | ✓   | ✓               | NA               | NA             | ✓                                    | ✓ NC     | o      | ✓        | ✓           | ✓    | ✓            |
| MOGERAUG2 | +                                           | + NC   | -                          | -             | **                               | ✓                | ✓   | ✓               | NA               | NA             | ✓                                    | ✓ NC     | o      | ✓        | ✓           | ✓    | ✓            |
| MOGERAUG3 | +                                           | + NC   | -                          | -             | **                               | ✓                | ✓   | ✓               | NA               | NA             | ✓                                    | ✓ NC     | o      | ✓        | ✓           | ✓    | ✓            |
| MOSWEGOT  | +                                           | +      | -                          | -             | **                               | ✓                | ✓   | ✓               | ✓                | ✓              | ✓                                    | o        | o      | ✓        | ✓           | ✓    | ✓            |
| MRFIT     | ++                                          | ++     | -                          | -             | **                               | ✓                | ✓   | ✓               | ✓                | ✓              | ✓                                    | o        | ✓      | ✓        | ✓           | ✓    | ✓            |
| NHANESIII | +                                           | -      | -                          | +             | *                                | ✓                | ✓   | ✓               | ✓                | ✓              | ✓ NC                                 | o        | o      | ✓ NC     | ✓ NC        | ✓ NC | ✓ NC         |
| NHS       | +                                           | +      | +                          | -             | **                               | ✓                | ✓   | ✓               | NA               | NA             | ✓                                    | ✓ NC     | o      | o        | o           | o    | o            |
| NPHSII    | ++                                          | ++     | ++ NC                      | + NC          | **                               | ✓                | ✓   | ✓               | ✓                | ✓              | ✓                                    | ✓ NC     | ✓ NC   | ✓        | ✓           | ✓    | ✓            |

| Study    | Coronary heart disease assessed at baseline |        |                            |               | Definition of incident endpoints |                  |     |                 |                  |                | Classification of incident endpoints |          |        |          |             |      |              |
|----------|---------------------------------------------|--------|----------------------------|---------------|----------------------------------|------------------|-----|-----------------|------------------|----------------|--------------------------------------|----------|--------|----------|-------------|------|--------------|
|          | MI                                          | Angina | Coronary revascularization | Heart failure | Death                            | Nonfatal MI      |     |                 | Nonfatal Stroke  |                | MI                                   |          |        | Stroke   |             |      |              |
|          |                                             |        |                            |               |                                  | Clinical feature | ECG | Cardiac markers | Clinical feature | CT/MRI imaging | Definite                             | Probable | Silent | Ischemic | Hemorrhagic | SAH  | Unclassified |
| NSHS     | ++                                          | ++     | ++                         | ++            | **                               | ✓                | ✓   | ✓               | ✓                | ✓              | ✓                                    | 0        | 0      | ✓        | ✓           | ✓    | ✓            |
| PRIME    | ++                                          | ++     | +                          | -             | **                               | ✓                | ✓   | ✓               | ✓                | ✓              | ✓                                    | 0        | 0      | ✓        | ✓           | ✓    | ✓            |
| PROSPER  | ++                                          | ++     | ++                         | ++            | **                               | ✓                | ✓   | ✓               | ✓                | ✓              | ✓                                    | 0        | 0      | NS       | NS          | NS   | ✓            |
| QUEBEC   | ++                                          | ++     | -                          | -             | **                               | ✓                | ✓   | ✓               | ✓                | ✓              | ✓                                    | 0        | ✓      | 0        | 0           | 0    | ✓            |
| RANCHO   | ++                                          | ++     | ++                         | +             | *                                | ✓                | ✓   | ✓               | ✓                | ✓              | ✓                                    | 0        | 0      | ✓        | ✓           | ✓    | ✓            |
| REYK     | ++                                          | ++     | ++                         | -             | **                               | ✓                | ✓   | ✓               | ✓                | ✓              | ✓                                    | ✓        | 0      | ✓        | ✓           | ✓    | ✓            |
| ROTT     | ++                                          | ++ NC  | ++                         | ++            | **                               | ✓                | ✓   | ✓               | NA               | NA             | ✓                                    | ✓ NC     | 0      | ✓        | ✓           | ✓    | ✓            |
| SHS      | ++ NC                                       | ++ NC  | ++ NC                      | ++ NC         | **                               | ✓                | ✓   | ✓               | ✓                | ✓              | ✓                                    | ✓ NC     | 0      | ✓        | ✓           | ✓    | ✓            |
| SPEED    | ++                                          | ++NC   | -                          | -             | **                               | ✓                | ✓   | ✓               | ✓                | ✓              | ✓                                    | 0        | ✓ NC   | ✓        | ✓           | ✓    | ✓            |
| TARFS    | ++                                          | ++     | ++ NC                      | -             | *                                | ✓                | ✓   | 0               | ✓                | 0              | ✓                                    | 0        | ✓      | ✓        | 0           | 0    | ✓            |
| ULSAM    | ++                                          | ++     | ++                         | ++            | **                               | ✓                | ✓   | ✓               | ✓                | ✓              | ✓                                    | 0        | 0      | ✓        | ✓           | ✓    | ✓            |
| USPHS    | +                                           | -      | -                          | -             | **                               | ✓                | ✓   | ✓               | NA               | NA             | ✓                                    | 0        | 0      | ✓ NC     | ✓ NC        | ✓ NC | ✓ NC         |
| USPHS2   | +                                           | -      | -                          | -             | *                                | ✓                | ✓   | ✓               | ✓                | ✓              | ✓                                    | 0        | 0      | ✓        | ✓           | ✓    | ✓            |
| WHIHABPS | +                                           | +      | +                          | NS            | **                               | ✓                | ✓   | ✓               | ✓                | ✓              | ✓                                    | 0        | 0      | ✓        | ✓           | ✓    | ✓            |
| WHITEI   | +                                           | + NC   | + NC                       | +             | *                                | -                | -   | -               | -                | -              | -                                    | -        | -      | -        | -           | -    | -            |
| WHITEII  | ++                                          | ++ NC  | ++ NC                      | ++ NC         | *                                | ✓                | ✓   | ✓               | ✓                | ✓              | ✓                                    | 0        | 0      | ✓        | ✓           | ✓    | ✓            |
| WHS      | +                                           | +      | +                          | -             | **                               | ✓                | ✓   | ✓               | ✓                | ✓              | ✓                                    | 0        | 0      | ✓        | ✓           | ✓    | ✓            |
| WOSCOPS  | ++                                          | ++     | ++ NC                      | ++ NC         | **                               | ✓                | ✓   | ✓               | ✓                | ✓              | ✓                                    | ✓        | ✓ NC   | 0        | 0           | 0    | ✓            |

-: Not recorded; +: Self-report only; ++: Self-report supplemented by objective criteria (e.g., Electrocardiogram, Physical examination)

\* Death certificate only; \*\* Death certificate supplemented by medical record

0: Feature not included in criteria; ✓: Feature included in criteria

SAH: Subarachnoid haemorrhage; NS: Not stated

NC = reportedly measured but data not contributed to the ERFC; NA = not applicable, where cohorts contributed data on fatal endpoints only

**eTable 4. Summary of data available and associations with CRP levels.**

|                                                        | Summary of available data |                     |                | Association with log <sub>e</sub> CRP value                                                                |
|--------------------------------------------------------|---------------------------|---------------------|----------------|------------------------------------------------------------------------------------------------------------|
|                                                        | No. of studies            | No. of participants | Mean (SD) or % | Percent difference (95% CI) in CRP levels per 1 SD increase or compared to reference category <sup>§</sup> |
| Log <sub>e</sub> CRP (mg/l)                            | 54                        | 160309              | 0.62 (1.11)    | -                                                                                                          |
| Age at survey (years)                                  | 54                        | 160309              | 59.8 (8.2)     | 15% (12%, 17%)                                                                                             |
| <b>Non-lipid markers</b>                               |                           |                     |                |                                                                                                            |
| Systolic blood pressure (mmHg)                         | 52                        | 152145              | 137 (18)       | 13% (11%, 16%)                                                                                             |
| Diastolic blood pressure (mmHg)                        | 52                        | 153810              | 81 (10)        | 10% (7%, 12%)                                                                                              |
| Body mass index (kg/m <sup>2</sup> )                   | 53                        | 155391              | 26.6 (4.4)     | 37% (33%, 40%)                                                                                             |
| <b>Lipid markers</b>                                   |                           |                     |                |                                                                                                            |
| Total cholesterol (mmol/l)                             | 53                        | 157758              | 5.90 (1.07)    | 3% (2%, 5%)                                                                                                |
| LDL cholesterol (mmol/l)                               | 12                        | 50157               | 3.51 (0.85)    | 9% (2%, 16%)                                                                                               |
| Non-HDL cholesterol (mmol/l)                           | 51                        | 144752              | 4.60 (1.07)    | 10% (8%, 12%)                                                                                              |
| HDL cholesterol (mmol/l)                               | 51                        | 144792              | 1.30 (0.38)    | -18% (-20%, -16%)                                                                                          |
| Log <sub>e</sub> triglycerides (mmol/l)                | 46                        | 130201              | 0.38 (0.51)    | 21% (17%, 25%)                                                                                             |
| <b>Inflammatory and metabolic markers</b>              |                           |                     |                |                                                                                                            |
| Fibrinogen level (μmol/l)                              | 32                        | 97146               | 9.91 (2.27)    | 72% (64%, 81%)                                                                                             |
| Albumin (g/l)                                          | 22                        | 61148               | 43.1 (4.4)     | -20% (-25%, -15%)                                                                                          |
| Log <sub>e</sub> leukocyte count (x10 <sup>9</sup> /l) | 19                        | 40094               | 1.85 (0.27)    | 36% (30%, 42%)                                                                                             |
| Log <sub>e</sub> interleukin 6 (ng/l)                  | 11                        | 26465               | 0.55 (0.66)    | 74% (55%, 96%)                                                                                             |
| Log <sub>e</sub> fibrin D-dimer (μg/l)                 | 7                         | 14018               | 4.57 (0.84)    | 35% (16%, 57%)                                                                                             |
| Fasting glucose (mmol/l)                               | 24                        | 49487               | 5.83 (1.83)    | 14% (10%, 18%)                                                                                             |
| <b>Categorical variables</b>                           |                           |                     |                |                                                                                                            |
| Sex                                                    |                           |                     |                |                                                                                                            |
| Male                                                   | 49                        | 84138               | 52%            | Ref                                                                                                        |
| Female                                                 | 36                        | 76171               | 48%            | 8% (1%, 16%)                                                                                               |
| Ethnicity                                              |                           |                     |                |                                                                                                            |
| White                                                  | 42                        | 129017              | 94%            | Ref                                                                                                        |
| Asian                                                  | 7                         | 3862                | 3%             | -16% (-40%, 19%)                                                                                           |
| Black                                                  | 14                        | 5101                | 4%             | 26% (15%, 38%)                                                                                             |
| Smoking status                                         |                           |                     |                |                                                                                                            |
| Not current                                            | 53                        | 125132              | 79%            | Ref                                                                                                        |
| Current                                                | 51                        | 32286               | 21%            | 37% (31%, 44%)                                                                                             |
| Alcohol consumption                                    |                           |                     |                |                                                                                                            |
| Not current                                            | 43                        | 49552               | 35%            | Ref                                                                                                        |
| Current                                                | 42                        | 90130               | 65%            | -5% (-9%, -1%)                                                                                             |
| History of diabetes                                    |                           |                     |                |                                                                                                            |
| No                                                     | 51                        | 143257              | 94%            | Ref                                                                                                        |
| Yes                                                    | 48                        | 9650                | 6%             | 32% (24%, 41%)                                                                                             |
| Physical activity                                      |                           |                     |                |                                                                                                            |
| Inactive                                               | 27                        | 30331               | 64%            | Ref                                                                                                        |
| Active                                                 | 14                        | 16950               | 36%            | -24% (-32%, -14%)                                                                                          |

<sup>§</sup> Percent change in CRP per 1-SD higher value of the row variable (or, for categorical variables, the percentage difference in mean CRP levels compared to reference category) adjusted for sex and age, pooled across studies using random effects meta-analysis.



**eTable 5. Risk ratios for vascular disease and non-vascular mortality per 3-fold higher baseline and usual CRP levels and between study heterogeneity statistics.**

| Outcome                                           | No. of studies | No. of participants | No. of outcomes | Risk ratio (95% CI) per 3-fold higher CRP levels <sup>†</sup> |                                   | Wald $\chi^2_1$ | Between study heterogeneity in models involving usual log <sub>e</sub> CRP levels |         |                         |
|---------------------------------------------------|----------------|---------------------|-----------------|---------------------------------------------------------------|-----------------------------------|-----------------|-----------------------------------------------------------------------------------|---------|-------------------------|
|                                                   |                |                     |                 | Baseline log <sub>e</sub> CRP levels                          | Usual log <sub>e</sub> CRP levels |                 | Q statistic $\chi^2$ (df)                                                         | p-value | I <sup>2</sup> (95% CI) |
| <b>Fatal/ non-fatal CHD and stroke outcomes</b>   |                |                     |                 |                                                               |                                   |                 |                                                                                   |         |                         |
| Coronary heart disease                            | 48             | 151972              | 10341           | 1.36 (1.32, 1.40)                                             | 1.68 (1.59, 1.78)                 | 317             | 90 (47)                                                                           | <0.0001 | 48 (27, 63)             |
| Non-fatal MI <sup>‡</sup>                         | 25             | 47113               | 4610            | 1.31 (1.24, 1.38)                                             | 1.59 (1.45, 1.75)                 | 93              | 53 (24)                                                                           | 0.001   | 54 (28, 71)             |
| Fatal MI <sup>‡</sup>                             | 25             | 44835               | 1501            | 1.43 (1.31, 1.56)                                             | 1.84 (1.59, 2.14)                 | 65              | 39 (24)                                                                           | 0.025   | 39 (1, 62)              |
| Ischaemic stroke                                  | 23             | 94761               | 2611            | 1.25 (1.18, 1.32)                                             | 1.46 (1.32, 1.61)                 | 57              | 34 (22)                                                                           | 0.049   | 35 (0, 61)              |
| Haemorrhagic stroke                               | 13             | 74548               | 364             | 1.04 (0.91, 1.19)                                             | 1.07 (0.86, 1.32)                 | 0.3             | 18 (12)                                                                           | 0.125   | 32 (0, 65)              |
| Unclassified stroke                               | 16             | 54825               | 953             | 1.24 (1.13, 1.34)                                             | 1.41 (1.22, 1.63)                 | 21              | 23 (15)                                                                           | 0.084   | 35 (0, 64)              |
| <b>Fatal outcomes</b>                             |                |                     |                 |                                                               |                                   |                 |                                                                                   |         |                         |
| All vascular deaths                               | 37             | 136912              | 3430            | 1.43 (1.35, 1.51)                                             | 1.82 (1.66, 2.00)                 | 160             | 73 (36)                                                                           | <0.0001 | 51 (28, 66)             |
| All nonvascular deaths                            | 38             | 138063              | 8369            | 1.29 (1.24, 1.34)                                             | 1.55 (1.46, 1.66)                 | 177             | 86 (37)                                                                           | <0.0001 | 57 (38, 70)             |
| <b>Cancer deaths</b>                              |                |                     |                 |                                                               |                                   |                 |                                                                                   |         |                         |
| Respiratory / intrathoracic cancer deaths         | 24             | 61356               | 666             | 1.66 (1.50, 1.83)                                             | 2.32 (1.96, 2.74)                 | 95              | 32 (23)                                                                           | 0.094   | 29 (0, 57)              |
| Breast cancer deaths                              | 8              | 18276               | 130             | 1.46 (1.21, 1.76)                                             | 1.88 (1.39, 2.55)                 | 17              | 6 (7)                                                                             | 0.568   | 0 (0, 68)               |
| Blood related cancer deaths                       | 14             | 45806               | 220             | 1.34 (1.16, 1.54)                                             | 1.57 (1.24, 1.99)                 | 14              | 11 (13)                                                                           | 0.618   | 0 (0, 55)               |
| Digestive cancer deaths                           | 25             | 64508               | 906             | 1.23 (1.12, 1.35)                                             | 1.44 (1.23, 1.70)                 | 20              | 39 (24)                                                                           | 0.028   | 38 (0, 62)              |
| Genitourinary related cancer deaths               | 17             | 48646               | 502             | 1.26 (1.11, 1.43)                                             | 1.45 (1.18, 1.78)                 | 12              | 23 (16)                                                                           | 0.114   | 30 (0, 61)              |
| <b>Non-cancer nonvascular deaths</b>              |                |                     |                 |                                                               |                                   |                 |                                                                                   |         |                         |
| Respiratory disease deaths                        | 22             | 73342               | 915             | 1.35 (1.24, 1.48)                                             | 1.67 (1.44, 1.92)                 | 49              | 29 (21)                                                                           | 0.126   | 26 (0, 56)              |
| Digestive system (except liver) disease deaths    | 13             | 32943               | 173             | 1.36 (1.13, 1.64)                                             | 1.72 (1.24, 2.39)                 | 11              | 17 (12)                                                                           | 0.138   | 31 (0, 64)              |
| Endocrine, nutritional & metabolic disease deaths | 8              | 24505               | 180             | 1.37 (0.99, 1.88)                                             | 1.64 (0.97, 2.77)                 | 3.5             | 18 (7)                                                                            | 0.012   | 61 (16, 82)             |
| Nervous system disorder deaths                    | 11             | 37397               | 280             | 0.92 (0.74, 1.16)                                             | 0.90 (0.64, 1.28)                 | 0.3             | 19 (10)                                                                           | 0.045   | 46 (0, 73)              |
| External causes (violence/suicide/trauma)         | 19             | 74631               | 356             | 1.14 (1.02, 1.27)                                             | 1.26 (1.05, 1.52)                 | 6               | 12 (18)                                                                           | 0.840   | 0 (0, 49)               |
| Unclassified deaths                               | 9              | 30455               | 786             | 1.32 (1.17, 1.49)                                             | 1.57 (1.37, 1.81)                 | 41              | 9 (8)                                                                             | 0.354   | 10 (0, 68)              |

<sup>†</sup> Risk ratios are adjusted only for age, and stratified where appropriate, by sex and trial arm. Studies with fewer than 10 cases of CHD, stroke, and the composite all vascular and all non vascular deaths outcomes or 5 cases of the specific nonvascular outcomes were excluded from the analysis of that outcome. The risk ratios are presented per 1.11 higher log<sub>e</sub> CRP (i.e. 1-SD of observed levels at baseline), corresponding to a 3-fold higher CRP levels.

<sup>‡</sup> Direct comparison of risk ratios for non-fatal MI vs. fatal MI using data from 25 studies that recorded both types of outcomes to avoid confounding by study when making comparisons.

**eTable 6. Risk ratios for vascular and nonvascular mortality per 3-fold higher usual CRP levels with progressive adjustment for usual levels of potential confounders.**

|                                       | Basic adjustment <sup>†</sup>                                    |                 |                         | Further adjustment <sup>†</sup>                                  |                 |                         |
|---------------------------------------|------------------------------------------------------------------|-----------------|-------------------------|------------------------------------------------------------------|-----------------|-------------------------|
|                                       | RR (95% CI) usual log <sub>e</sub> CRP levels, usual confounders | Wald $\chi^2_1$ | I <sup>2</sup> (95% CI) | RR (95% CI) usual log <sub>e</sub> CRP levels, usual confounders | Wald $\chi^2_1$ | I <sup>2</sup> (95% CI) |
| <b>All vascular deaths</b>            | <b>27 studies, 95583 participants, 1810 events</b>               |                 |                         | <b>23 studies, 80905 participants, 1544 events</b>               |                 |                         |
| Adjusted for age, sex, and study      | 1.77 (1.59, 1.99)                                                | 99              | 41 (6, 63)              | 1.71 (1.53, 1.91)                                                | 86              | 33 (0, 60)              |
| plus systolic blood pressure          | 1.70 (1.52, 1.90)                                                | 87              | 36 (0, 60)              | 1.64 (1.46, 1.83)                                                | 73              | 30 (0, 58)              |
| plus smoking                          | 1.62 (1.46, 1.80)                                                | 84              | 22 (0, 52)              | 1.58 (1.41, 1.77)                                                | 61              | 28 (0, 57)              |
| plus history of diabetes              | 1.56 (1.40, 1.73)                                                | 67              | 23 (0, 52)              | 1.49 (1.33, 1.67)                                                | 49              | 22 (0, 53)              |
| plus BMI                              | 1.65 (1.47, 1.85)                                                | 74              | 24 (0, 53)              | 1.59 (1.40, 1.81)                                                | 51              | 30 (0, 58)              |
| plus log <sub>e</sub> triglycerides   | 1.62 (1.45, 1.81)                                                | 73              | 18 (0, 49)              | 1.55 (1.38, 1.75)                                                | 51              | 21 (0, 53)              |
| plus total cholesterol                | 1.65 (1.46, 1.86)                                                | 66              | 30 (0, 56)              | 1.59 (1.39, 1.81)                                                | 45              | 35 (0, 61)              |
| plus non-HDL cholesterol <sup>§</sup> | -                                                                | -               | -                       | 1.55 (1.37, 1.76)                                                | 49              | 23 (0, 54)              |
| plus HDL cholesterol <sup>§</sup>     | -                                                                | -               | -                       | 1.56 (1.38, 1.76)                                                | 50              | 23 (0, 54)              |
| plus alcohol <sup>§</sup>             | -                                                                | -               | -                       | 1.55 (1.37, 1.76)                                                | 49              | 23 (0, 54)              |
| <b>Non-vascular deaths</b>            | <b>30 studies, 99863 participants, 5109 events</b>               |                 |                         | <b>26 studies, 88399 participants, 4599 events</b>               |                 |                         |
| Adjusted for age, sex, and study      | 1.54 (1.42, 1.67)                                                | 105             | 56 (34, 71)             | 1.55 (1.41, 1.69)                                                | 93              | 58 (34, 73)             |
| plus systolic blood pressure          | 1.55 (1.43, 1.68)                                                | 108             | 54 (30, 70)             | 1.56 (1.43, 1.70)                                                | 96              | 56 (32, 72)             |
| plus smoking                          | 1.47 (1.36, 1.59)                                                | 93              | 45 (15, 64)             | 1.47 (1.35, 1.60)                                                | 82              | 47 (16, 66)             |
| plus history of diabetes              | 1.45 (1.33, 1.57)                                                | 76              | 50 (24, 67)             | 1.45 (1.33, 1.59)                                                | 67              | 53 (26, 70)             |
| plus BMI                              | 1.56 (1.42, 1.71)                                                | 86              | 54 (31, 70)             | 1.57 (1.42, 1.73)                                                | 79              | 55 (30, 71)             |
| plus log <sub>e</sub> triglycerides   | 1.56 (1.43, 1.71)                                                | 91              | 52 (27, 68)             | 1.57 (1.43, 1.73)                                                | 84              | 52 (25, 70)             |
| plus total cholesterol                | 1.54 (1.41, 1.68)                                                | 90              | 50 (24, 67)             | 1.55 (1.41, 1.71)                                                | 83              | 51 (23, 69)             |
| plus non-HDL cholesterol <sup>§</sup> | -                                                                | -               | -                       | 1.56 (1.42, 1.72)                                                | 85              | 50 (22, 68)             |
| plus HDL cholesterol <sup>§</sup>     | -                                                                | -               | -                       | 1.55 (1.42, 1.70)                                                | 90              | 46 (15, 66)             |
| plus alcohol <sup>§</sup>             | -                                                                | -               | -                       | 1.54 (1.40, 1.68)                                                | 88              | 45 (12, 65)             |

<sup>†</sup> Risk ratios are presented per 1.11 higher log<sub>e</sub> CRP (i.e. 1-SD of observed levels at baseline), corresponding to a 3-fold higher CRP levels, progressively adjusted as shown and stratified where appropriate, by sex and trial arm.

<sup>†</sup> Analyses were restricted to participants with complete information on sex, trial arm, and all confounding variables. Studies with fewer than 10 cases were excluded from the analysis of each outcome.

<sup>§</sup> Non-HDL cholesterol has been substituted for total cholesterol in these adjusted models

I<sup>2</sup> is a measure of consistency across studies: the percentage of variance in estimated log RRs that is attributable to between study variation as opposed to sampling variation. Values of I<sup>2</sup> close to 0 correspond to lack of heterogeneity.

**eTable 7. Risk ratios for vascular and non-vascular mortality per 3-fold higher usual CRP levels with adjustment for usual levels of conventional risk factors plus inflammatory markers.**

| Outcome / adjusted variables <sup>†</sup> | No. of studies | No. of participants | No. of outcomes | RR (95% CI) usual log <sub>e</sub> CRP levels, usual confounders | Wald $\chi^2_1$ | I <sup>2</sup> (95% CI) |
|-------------------------------------------|----------------|---------------------|-----------------|------------------------------------------------------------------|-----------------|-------------------------|
| <b>All vascular deaths</b>                |                |                     |                 |                                                                  |                 |                         |
| Adjusted for age, sex, and study          | 17             | 64740               | 1138            | 1.65 (1.49, 1.83)                                                | 89              | 4 (0, 53)               |
| plus conventional risk factors            | 17             | 64740               | 1138            | 1.53 (1.33, 1.75)                                                | 36              | 14 (0, 50)              |
| plus fibrinogen                           | 17             | 64740               | 1138            | 1.34 (1.18, 1.52)                                                | 22              | 0 (0, 51)               |
| Adjusted for age, sex, and study          | 9              | 27005               | 824             | 1.67 (1.40, 1.99)                                                | 33              | 49 (0, 76)              |
| plus conventional risk factors            | 9              | 27005               | 824             | 1.57 (1.32, 1.87)                                                | 26              | 32 (0, 69)              |
| plus albumin                              | 9              | 27005               | 824             | 1.46 (1.27, 1.68)                                                | 27              | 13 (0, 55)              |
| Adjusted for age, sex, and study          | 9              | 20078               | 678             | 1.67 (1.38, 2.01)                                                | 29              | 40 (0, 72)              |
| plus conventional risk factors            | 9              | 20078               | 678             | 1.52 (1.30, 1.78)                                                | 27              | 6 (0, 67)               |
| plus log <sub>e</sub> leukocyte count     | 9              | 20078               | 678             | 1.47 (1.24, 1.76)                                                | 19              | 22 (0, 63)              |
| Adjusted for age, sex, and study          | 5              | 18054               | 392             | 1.48 (1.26, 1.75)                                                | 23              | 0 (0, 79)               |
| plus conventional risk factors            | 5              | 18054               | 392             | 1.30 (1.08, 1.56)                                                | 8               | 0 (0, 79)               |
| plus log <sub>e</sub> interleukin 6       | 5              | 18054               | 392             | 1.02 (0.79, 1.32)                                                | 0               | 12 (0, 82)              |
| <b>Non-vascular deaths</b>                |                |                     |                 |                                                                  |                 |                         |
| Adjusted for age, sex, and study          | 18             | 65311               | 3472            | 1.55 (1.39, 1.71)                                                | 69              | 57 (28, 75)             |
| plus conventional risk factors            | 18             | 65311               | 3472            | 1.52 (1.37, 1.69)                                                | 62              | 44 (3, 68)              |
| plus fibrinogen                           | 18             | 65311               | 3472            | 1.34 (1.20, 1.50)                                                | 25              | 49 (12, 70)             |
| Adjusted for age, sex, and study          | 10             | 30972               | 2579            | 1.64 (1.42, 1.90)                                                | 44              | 75 (53, 87)             |
| plus conventional risk factors            | 10             | 30972               | 2579            | 1.53 (1.36, 1.73)                                                | 48              | 51 (0, 76)              |
| plus albumin                              | 10             | 30972               | 2579            | 1.45 (1.29, 1.62)                                                | 41              | 47 (0, 74)              |
| Adjusted for age, sex, and study          | 9              | 20078               | 1819            | 1.52 (1.27, 1.83)                                                | 21              | 73 (48, 86)             |
| plus conventional risk factors            | 9              | 20078               | 1819            | 1.45 (1.24, 1.70)                                                | 22              | 52 (0, 77)              |
| plus log <sub>e</sub> leukocyte count     | 9              | 20078               | 1819            | 1.36 (1.19, 1.56)                                                | 20              | 43 (0, 74)              |
| Adjusted for age, sex, and study          | 5              | 18054               | 1082            | 1.51 (1.27, 1.81)                                                | 21              | 66 (12, 87)             |
| plus conventional risk factors            | 5              | 18054               | 1082            | 1.49 (1.31, 1.70)                                                | 37              | 50 (0, 82)              |
| plus log <sub>e</sub> interleukin 6       | 5              | 18054               | 1082            | 1.16 (1.03, 1.30)                                                | 6               | 0 (0, 79)               |

<sup>†</sup> Risk ratios are presented per 1.11 higher log<sub>e</sub> CRP (i.e. 1-SD of observed levels at baseline), corresponding to a 3-fold higher CRP levels, progressively adjusted as shown and stratified where appropriate, by sex and trial arm.

<sup>‡</sup> The conventional risk factors included age, sex, systolic blood pressure, smoking, history of diabetes, BMI, log<sub>e</sub> triglycerides, non-HDL cholesterol, HDL cholesterol, and alcohol consumption. Analyses were restricted to participants with complete information on sex, trial arm, and all the conventional risk factors plus each inflammatory marker in turn. Studies with fewer than 10 cases were excluded from the analysis of each outcome.

I<sup>2</sup> is a measure of consistency across studies: the percentage of variance in estimated log RRs that is attributable to between study variation as opposed to sampling variation. Values of I<sup>2</sup> close to 0 correspond to lack of heterogeneity.

**eTable 8. Risk ratios for major vascular and nonvascular outcomes per 3-fold higher baseline CRP levels with progressive adjustment for baseline levels of potential confounders.**

|                                       | Basic adjustment <sup>†</sup>                                                   |                    |                         | Further adjustment <sup>†</sup>                                                 |                    |                         |
|---------------------------------------|---------------------------------------------------------------------------------|--------------------|-------------------------|---------------------------------------------------------------------------------|--------------------|-------------------------|
|                                       | RR (95% CI)<br>baseline log <sub>e</sub> CRP<br>levels, baseline<br>confounders | Wald<br>$\chi^2_1$ | I <sup>2</sup> (95% CI) | RR (95% CI)<br>baseline log <sub>e</sub> CRP<br>levels, baseline<br>confounders | Wald<br>$\chi^2_1$ | I <sup>2</sup> (95% CI) |
| <b>Coronary heart disease</b>         | <b>37 studies, 109742 participants, 8056 events</b>                             |                    |                         | <b>31 studies, 91990 participants, 5373 events</b>                              |                    |                         |
| Adjusted for age, sex, and study      | 1.34 (1.30, 1.39)                                                               | 258                | 38 (7, 58)              | 1.34 (1.28, 1.40)                                                               | 168                | 45 (16, 64)             |
| plus systolic blood pressure          | 1.32 (1.27, 1.36)                                                               | 229                | 35 (3, 56)              | 1.31 (1.25, 1.37)                                                               | 148                | 42 (11, 62)             |
| plus smoking <sup>‡</sup>             | 1.28 (1.24, 1.32)                                                               | 214                | 24 (0, 50)              | 1.27 (1.22, 1.32)                                                               | 138                | 32 (0, 56)              |
| plus history of diabetes              | 1.26 (1.22, 1.31)                                                               | 164                | 34 (1, 56)              | 1.25 (1.20, 1.31)                                                               | 103                | 41 (10, 62)             |
| plus BMI                              | 1.25 (1.21, 1.29)                                                               | 171                | 21 (0, 47)              | 1.24 (1.19, 1.29)                                                               | 105                | 31 (0, 56)              |
| plus log <sub>e</sub> triglycerides   | 1.23 (1.19, 1.28)                                                               | 138                | 25 (0, 50)              | 1.23 (1.17, 1.28)                                                               | 86                 | 34 (0, 57)              |
| plus total cholesterol                | 1.24 (1.20, 1.28)                                                               | 150                | 21 (0, 48)              | 1.23 (1.18, 1.29)                                                               | 92                 | 31 (0, 56)              |
| plus non-HDL cholesterol <sup>§</sup> | -                                                                               | -                  | -                       | 1.23 (1.18, 1.28)                                                               | 100                | 24 (0, 52)              |
| plus HDL cholesterol <sup>§</sup>     | -                                                                               | -                  | -                       | 1.22 (1.17, 1.27)                                                               | 92                 | 24 (0, 51)              |
| plus alcohol <sup>§</sup>             | -                                                                               | -                  | -                       | 1.22 (1.17, 1.27)                                                               | 84                 | 28 (0, 54)              |
| <b>Ischaemic stroke</b>               | <b>17 studies, 65825 participants, 2006 events</b>                              |                    |                         | <b>15 studies, 60763 participants, 1931 events</b>                              |                    |                         |
| Adjusted for age, sex, and study      | 1.24 (1.19, 1.31)                                                               | 77                 | 0 (0, 51)               | 1.24 (1.18, 1.31)                                                               | 74                 | 0 (0, 54)               |
| plus systolic blood pressure          | 1.21 (1.15, 1.27)                                                               | 56                 | 0 (0, 51)               | 1.21 (1.15, 1.27)                                                               | 54                 | 0 (0, 54)               |
| plus smoking <sup>‡</sup>             | 1.19 (1.14, 1.25)                                                               | 48                 | 0 (0, 51)               | 1.20 (1.14, 1.26)                                                               | 47                 | 0 (0, 54)               |
| plus history of diabetes              | 1.17 (1.11, 1.23)                                                               | 37                 | 0 (0, 51)               | 1.17 (1.11, 1.23)                                                               | 36                 | 0 (0, 54)               |
| plus BMI                              | 1.17 (1.11, 1.23)                                                               | 35                 | 0 (0, 51)               | 1.17 (1.11, 1.24)                                                               | 34                 | 0 (0, 54)               |
| plus log <sub>e</sub> triglycerides   | 1.16 (1.10, 1.23)                                                               | 31                 | 0 (0, 51)               | 1.16 (1.10, 1.23)                                                               | 29                 | 0 (0, 54)               |
| plus total cholesterol                | 1.17 (1.10, 1.23)                                                               | 32                 | 0 (0, 51)               | 1.16 (1.10, 1.23)                                                               | 30                 | 0 (0, 54)               |
| plus non-HDL cholesterol <sup>§</sup> | -                                                                               | -                  | -                       | 1.17 (1.10, 1.23)                                                               | 30                 | 0 (0, 54)               |
| plus HDL cholesterol <sup>§</sup>     | -                                                                               | -                  | -                       | 1.16 (1.10, 1.23)                                                               | 29                 | 0 (0, 54)               |
| plus alcohol <sup>§</sup>             | -                                                                               | -                  | -                       | 1.16 (1.10, 1.23)                                                               | 30                 | 0 (0, 54)               |
| <b>All vascular deaths</b>            | <b>27 studies, 95583 participants, 1810 events</b>                              |                    |                         | <b>23 studies, 80905 participants, 1544 events</b>                              |                    |                         |
| Adjusted for age, sex, and study      | 1.41 (1.32, 1.51)                                                               | 96                 | 42 (9, 64)              | 1.39 (1.30, 1.49)                                                               | 83                 | 37 (0, 62)              |
| plus systolic blood pressure          | 1.39 (1.30, 1.49)                                                               | 89                 | 40 (4, 62)              | 1.37 (1.27, 1.47)                                                               | 75                 | 35 (0, 61)              |
| plus smoking <sup>‡</sup>             | 1.35 (1.27, 1.44)                                                               | 84                 | 32 (0, 57)              | 1.33 (1.24, 1.43)                                                               | 66                 | 30 (0, 58)              |
| plus history of diabetes              | 1.34 (1.25, 1.43)                                                               | 69                 | 37 (0, 61)              | 1.32 (1.22, 1.41)                                                               | 54                 | 37 (0, 62)              |
| plus BMI                              | 1.34 (1.26, 1.44)                                                               | 79                 | 30 (0, 56)              | 1.32 (1.23, 1.42)                                                               | 60                 | 32 (0, 59)              |
| plus log <sub>e</sub> triglycerides   | 1.35 (1.26, 1.44)                                                               | 75                 | 33 (0, 58)              | 1.33 (1.23, 1.43)                                                               | 56                 | 35 (0, 61)              |
| plus total cholesterol                | 1.34 (1.26, 1.44)                                                               | 73                 | 33 (0, 58)              | 1.32 (1.23, 1.43)                                                               | 54                 | 36 (0, 61)              |
| plus non-HDL cholesterol <sup>§</sup> | -                                                                               | -                  | -                       | 1.33 (1.23, 1.43)                                                               | 54                 | 37 (0, 62)              |
| plus HDL cholesterol <sup>§</sup>     | -                                                                               | -                  | -                       | 1.32 (1.23, 1.43)                                                               | 54                 | 35 (0, 61)              |
| plus alcohol <sup>§</sup>             | -                                                                               | -                  | -                       | 1.32 (1.23, 1.43)                                                               | 54                 | 36 (0, 61)              |
| <b>Non-vascular deaths</b>            | <b>30 studies, 99863 participants, 5109 events</b>                              |                    |                         | <b>26 studies, 88399 participants, 4599 events</b>                              |                    |                         |
| Adjusted for age, sex, and study      | 1.29 (1.22, 1.35)                                                               | 97                 | 57 (36, 72)             | 1.29 (1.22, 1.36)                                                               | 85                 | 60 (38, 74)             |
| plus systolic blood pressure          | 1.29 (1.22, 1.35)                                                               | 98                 | 57 (35, 71)             | 1.29 (1.22, 1.36)                                                               | 84                 | 60 (38, 74)             |
| plus smoking <sup>‡</sup>             | 1.25 (1.19, 1.31)                                                               | 91                 | 48 (21, 66)             | 1.25 (1.19, 1.32)                                                               | 78                 | 52 (24, 69)             |
| plus history of diabetes              | 1.24 (1.19, 1.30)                                                               | 81                 | 51 (25, 68)             | 1.25 (1.18, 1.31)                                                               | 69                 | 54 (28, 71)             |
| plus BMI                              | 1.27 (1.21, 1.34)                                                               | 87                 | 55 (32, 70)             | 1.28 (1.21, 1.35)                                                               | 79                 | 57 (33, 72)             |
| plus log <sub>e</sub> triglycerides   | 1.27 (1.21, 1.34)                                                               | 92                 | 52 (27, 68)             | 1.28 (1.21, 1.35)                                                               | 83                 | 53 (27, 70)             |
| plus total cholesterol                | 1.26 (1.20, 1.32)                                                               | 90                 | 50 (23, 67)             | 1.27 (1.20, 1.33)                                                               | 79                 | 52 (25, 69)             |
| plus non-HDL cholesterol <sup>§</sup> | -                                                                               | -                  | -                       | 1.27 (1.21, 1.34)                                                               | 81                 | 52 (25, 70)             |
| plus HDL cholesterol <sup>§</sup>     | -                                                                               | -                  | -                       | 1.27 (1.21, 1.33)                                                               | 86                 | 48 (18, 67)             |
| plus alcohol <sup>§</sup>             | -                                                                               | -                  | -                       | 1.27 (1.20, 1.33)                                                               | 87                 | 47 (17, 67)             |

<sup>†</sup> Risk ratios are presented per 1.11 higher log<sub>e</sub> CRP (i.e. 1-SD of observed levels at baseline), corresponding to a 3-fold higher CRP levels, progressively adjusted as shown and stratified where appropriate, by sex and trial arm.

<sup>‡</sup> Analyses were restricted to participants with complete information on sex, trial arm, and all confounding variables. Studies with fewer than 10 cases were excluded from the analysis of each outcome.

<sup>§</sup> Non-HDL cholesterol has been substituted for total cholesterol in these adjusted models

I<sup>2</sup> is a measure of consistency across studies: the percentage of variance in estimated log RRs that is attributable to between study variation as opposed to sampling variation. Values of I<sup>2</sup> close to 0 correspond to lack of heterogeneity.

<sup>‡</sup>Subsidiary analyses were done in the 37,802 participants who had complete data on all the risk factors in this table plus information on pack-years of smoking. In this subset, the RR for CHD, adjusted for the factors listed in the left-hand column above, was 1.14 (1.08-1.20) and it was almost exactly the same when adjustment also included information on pack-years of smoking. The pattern of findings was similar in such subsidiary analyses of other disease endpoints.

**eTable 9. Risk ratios for major vascular and nonvascular outcomes per 3-fold higher usual CRP levels with progressive adjustment for usual levels of potential confounders, pooled by fixed effects meta-analysis.**

|                                       | Basic adjustment <sup>†</sup>                                    |                 |                         | Further adjustment <sup>†</sup>                                  |                 |                         |
|---------------------------------------|------------------------------------------------------------------|-----------------|-------------------------|------------------------------------------------------------------|-----------------|-------------------------|
|                                       | RR (95% CI) usual log <sub>e</sub> CRP levels, usual confounders | Wald $\chi^2_1$ | I <sup>2</sup> (95% CI) | RR (95% CI) usual log <sub>e</sub> CRP levels, usual confounders | Wald $\chi^2_1$ | I <sup>2</sup> (95% CI) |
| <b>Coronary heart disease</b>         | <b>37 studies, 109742 participants, 8056 events</b>              |                 |                         | <b>31 studies, 91990 participants, 5373 events</b>               |                 |                         |
| Adjusted for age, sex, and study      | 1.61 (1.54, 1.68)                                                | 483             | 44 (17, 62)             | 1.61 (1.53, 1.69)                                                | 353             | 51 (26, 68)             |
| plus systolic blood pressure          | 1.54 (1.47, 1.61)                                                | 377             | 37 (7, 58)              | 1.54 (1.46, 1.62)                                                | 273             | 42 (12, 62)             |
| plus smoking                          | 1.47 (1.40, 1.53)                                                | 276             | 26 (0, 51)              | 1.47 (1.39, 1.55)                                                | 203             | 30 (0, 55)              |
| plus history of diabetes              | 1.42 (1.36, 1.49)                                                | 224             | 38 (7, 58)              | 1.41 (1.34, 1.49)                                                | 156             | 42 (10, 62)             |
| plus BMI                              | 1.43 (1.36, 1.50)                                                | 197             | 22 (0, 48)              | 1.43 (1.35, 1.52)                                                | 143             | 31 (0, 56)              |
| plus log <sub>e</sub> triglycerides   | 1.38 (1.32, 1.46)                                                | 159             | 26 (0, 51)              | 1.39 (1.31, 1.47)                                                | 117             | 35 (0, 58)              |
| plus total cholesterol                | 1.39 (1.32, 1.47)                                                | 163             | 24 (0, 50)              | 1.40 (1.32, 1.48)                                                | 121             | 33 (0, 57)              |
| plus non-HDL cholesterol <sup>§</sup> | -                                                                | -               | -                       | 1.39 (1.31, 1.47)                                                | 115             | 26 (0, 53)              |
| plus HDL cholesterol <sup>§</sup>     | -                                                                | -               | -                       | 1.37 (1.29, 1.46)                                                | 108             | 25 (0, 52)              |
| plus alcohol <sup>§</sup>             | -                                                                | -               | -                       | 1.36 (1.29, 1.45)                                                | 103             | 26 (0, 53)              |
| <b>Ischaemic stroke</b>               | <b>17 studies, 65825 participants, 2006 events</b>               |                 |                         | <b>15 studies, 60763 participants, 1931 events</b>               |                 |                         |
| Adjusted for age, sex, and study      | 1.43 (1.32, 1.55)                                                | 80              | 0 (0, 51)               | 1.43 (1.32, 1.55)                                                | 76              | 7 (0, 57)               |
| plus systolic blood pressure          | 1.34 (1.23, 1.45)                                                | 50              | 0 (0, 51)               | 1.33 (1.23, 1.45)                                                | 46              | 0 (0, 54)               |
| plus smoking                          | 1.31 (1.20, 1.42)                                                | 40              | 0 (0, 51)               | 1.31 (1.20, 1.42)                                                | 38              | 0 (0, 54)               |
| plus history of diabetes              | 1.25 (1.14, 1.35)                                                | 26              | 0 (0, 51)               | 1.24 (1.14, 1.36)                                                | 25              | 0 (0, 54)               |
| plus BMI                              | 1.29 (1.18, 1.41)                                                | 29              | 0 (0, 51)               | 1.29 (1.18, 1.42)                                                | 28              | 0 (0, 54)               |
| plus log <sub>e</sub> triglycerides   | 1.27 (1.16, 1.40)                                                | 26              | 0 (0, 51)               | 1.27 (1.15, 1.40)                                                | 24              | 0 (0, 54)               |
| plus total cholesterol                | 1.28 (1.17, 1.41)                                                | 27              | 0 (0, 51)               | 1.28 (1.16, 1.40)                                                | 25              | 0 (0, 54)               |
| plus non-HDL cholesterol <sup>§</sup> | -                                                                | -               | -                       | 1.28 (1.16, 1.40)                                                | 25              | 0 (0, 54)               |
| plus HDL cholesterol <sup>§</sup>     | -                                                                | -               | -                       | 1.27 (1.16, 1.40)                                                | 25              | 0 (0, 54)               |
| plus alcohol <sup>§</sup>             | -                                                                | -               | -                       | 1.27 (1.15, 1.40)                                                | 24              | 0 (0, 54)               |
| <b>All vascular deaths</b>            | <b>27 studies, 95583 participants, 1810 events</b>               |                 |                         | <b>23 studies, 80905 participants, 1544 events</b>               |                 |                         |
| Adjusted for age, sex, and study      | 1.71 (1.58, 1.85)                                                | 175             | 41 (6, 63)              | 1.66 (1.53, 1.80)                                                | 140             | 33 (0, 60)              |
| plus systolic blood pressure          | 1.65 (1.52, 1.79)                                                | 145             | 36 (0, 60)              | 1.60 (1.47, 1.74)                                                | 114             | 30 (0, 58)              |
| plus smoking                          | 1.59 (1.46, 1.73)                                                | 118             | 22 (0, 52)              | 1.55 (1.42, 1.69)                                                | 95              | 28 (0, 57)              |
| plus history of diabetes              | 1.52 (1.40, 1.66)                                                | 94              | 23 (0, 52)              | 1.47 (1.34, 1.61)                                                | 71              | 22 (0, 53)              |
| plus BMI                              | 1.61 (1.47, 1.76)                                                | 105             | 24 (0, 53)              | 1.57 (1.42, 1.73)                                                | 85              | 38 (0, 63)              |
| plus log <sub>e</sub> triglycerides   | 1.59 (1.45, 1.74)                                                | 97              | 18 (0, 49)              | 1.53 (1.39, 1.69)                                                | 74              | 21 (0, 53)              |
| plus total cholesterol                | 1.60 (1.46, 1.75)                                                | 102             | 30 (0, 56)              | 1.57 (1.43, 1.73)                                                | 85              | 58 (34, 74)             |
| plus non-HDL cholesterol <sup>§</sup> | -                                                                | -               | -                       | 1.53 (1.39, 1.69)                                                | 73              | 23 (0, 54)              |
| plus HDL cholesterol <sup>§</sup>     | -                                                                | -               | -                       | 1.56 (1.42, 1.72)                                                | 80              | 60 (37, 75)             |
| plus alcohol <sup>§</sup>             | -                                                                | -               | -                       | 1.56 (1.42, 1.72)                                                | 80              | 64 (44, 77)             |
| <b>Non-vascular deaths</b>            | <b>30 studies, 99863 participants, 5109 events</b>               |                 |                         | <b>26 studies, 88399 participants, 4599 events</b>               |                 |                         |
| Adjusted for age, sex, and study      | 1.46 (1.39, 1.53)                                                | 247             | 56 (34, 71)             | 1.45 (1.38, 1.52)                                                | 219             | 58 (34, 73)             |
| plus systolic blood pressure          | 1.47 (1.40, 1.54)                                                | 247             | 54 (30, 70)             | 1.46 (1.39, 1.54)                                                | 221             | 56 (32, 72)             |
| plus smoking                          | 1.41 (1.34, 1.48)                                                | 187             | 45 (15, 64)             | 1.40 (1.33, 1.48)                                                | 166             | 47 (16, 66)             |
| plus history of diabetes              | 1.38 (1.31, 1.45)                                                | 160             | 50 (24, 67)             | 1.37 (1.30, 1.44)                                                | 142             | 53 (26, 70)             |
| plus BMI                              | 1.48 (1.40, 1.56)                                                | 206             | 54 (31, 70)             | 1.47 (1.39, 1.55)                                                | 183             | 55 (30, 71)             |
| plus log <sub>e</sub> triglycerides   | 1.49 (1.41, 1.57)                                                | 209             | 52 (27, 68)             | 1.48 (1.40, 1.56)                                                | 186             | 52 (25, 70)             |
| plus total cholesterol                | 1.47 (1.39, 1.55)                                                | 199             | 50 (24, 67)             | 1.46 (1.38, 1.54)                                                | 177             | 51 (23, 69)             |
| plus non-HDL cholesterol <sup>§</sup> | -                                                                | -               | -                       | 1.47 (1.39, 1.55)                                                | 181             | 50 (22, 68)             |
| plus HDL cholesterol <sup>§</sup>     | -                                                                | -               | -                       | 1.47 (1.39, 1.55)                                                | 181             | 46 (15, 66)             |
| plus alcohol <sup>§</sup>             | -                                                                | -               | -                       | 1.46 (1.38, 1.54)                                                | 175             | 45 (12, 65)             |

<sup>†</sup> Risk ratios are presented per 1.11 higher log<sub>e</sub> CRP (i.e. 1-SD of observed levels at baseline), corresponding to a 3-fold higher CRP levels, progressively adjusted as shown and stratified where appropriate, by sex and trial arm.

<sup>‡</sup> Analyses were restricted to participants with complete information on sex, trial arm, and all confounding variables. Studies with fewer than 10 cases were excluded from the analysis of each outcome.

<sup>§</sup> Non-HDL cholesterol has been substituted for total cholesterol in these adjusted models

I<sup>2</sup> is a measure of consistency across studies: the percentage of variance in estimated log RRs that is attributable to between study variation as opposed to sampling variation. Values of I<sup>2</sup> close to 0 correspond to lack of heterogeneity.

**Table 10. Risk ratios for vascular and nonvascular mortality without censoring for non-fatal events per 3-fold higher usual CRP levels with progressive adjustment for usual levels of potential confounders.**

|                                       | Basic adjustment <sup>†</sup>                                    |                 |                         | Further adjustment <sup>†</sup>                                  |                 |                         |
|---------------------------------------|------------------------------------------------------------------|-----------------|-------------------------|------------------------------------------------------------------|-----------------|-------------------------|
|                                       | RR (95% CI) usual log <sub>e</sub> CRP levels, usual confounders | Wald $\chi^2_1$ | I <sup>2</sup> (95% CI) | RR (95% CI) usual log <sub>e</sub> CRP levels, usual confounders | Wald $\chi^2_1$ | I <sup>2</sup> (95% CI) |
| <b>All vascular deaths</b>            | <b>28 studies, 96025 participants, 3196 events</b>               |                 |                         | <b>23 studies, 81311 participants, 2795 events</b>               |                 |                         |
| Adjusted for age, sex, and study      | 1.79 (1.64, 1.95)                                                | 173             | 39 (4, 61)              | 1.76 (1.60, 1.93)                                                | 134             | 43 (7, 65)              |
| plus systolic blood pressure          | 1.70 (1.56, 1.85)                                                | 153             | 33 (0, 58)              | 1.67 (1.52, 1.83)                                                | 120             | 36 (0, 61)              |
| plus smoking                          | 1.62 (1.50, 1.74)                                                | 165             | 14 (0, 46)              | 1.60 (1.47, 1.74)                                                | 117             | 24 (0, 54)              |
| plus history of diabetes              | 1.56 (1.44, 1.69)                                                | 114             | 24 (0, 52)              | 1.52 (1.39, 1.66)                                                | 87              | 26 (0, 55)              |
| plus BMI                              | 1.65 (1.51, 1.80)                                                | 132             | 21 (0, 50)              | 1.62 (1.47, 1.78)                                                | 96              | 27 (0, 56)              |
| plus log <sub>e</sub> triglycerides   | 1.59 (1.48, 1.71)                                                | 151             | 6 (0, 37)               | 1.57 (1.44, 1.71)                                                | 104             | 15 (0, 48)              |
| plus total cholesterol                | 1.63 (1.50, 1.78)                                                | 124             | 21 (0, 50)              | 1.61 (1.45, 1.78)                                                | 86              | 31 (0, 58)              |
| plus non-HDL cholesterol <sup>§</sup> | -                                                                | -               | -                       | 1.57 (1.44, 1.72)                                                | 102             | 16 (0, 49)              |
| plus HDL cholesterol <sup>§</sup>     | -                                                                | -               | -                       | 1.57 (1.44, 1.71)                                                | 105             | 14 (0, 48)              |
| plus alcohol <sup>§</sup>             | -                                                                | -               | -                       | 1.57 (1.44, 1.71)                                                | 102             | 15 (0, 48)              |
| <b>Non-vascular deaths</b>            | <b>31 studies, 100302 participants, 6255 events</b>              |                 |                         | <b>26 studies, 88802 participants, 5518 events</b>               |                 |                         |
| Adjusted for age, sex, and study      | 1.53 (1.41, 1.65)                                                | 111             | 60 (40, 73)             | 1.55 (1.42, 1.69)                                                | 100             | 62 (43, 75)             |
| plus systolic blood pressure          | 1.54 (1.42, 1.66)                                                | 110             | 59 (40, 73)             | 1.56 (1.43, 1.70)                                                | 99              | 62 (42, 75)             |
| plus smoking                          | 1.45 (1.34, 1.56)                                                | 94              | 51 (25, 67)             | 1.46 (1.35, 1.59)                                                | 83              | 53 (27, 70)             |
| plus history of diabetes              | 1.42 (1.32, 1.54)                                                | 77              | 54 (31, 69)             | 1.44 (1.32, 1.57)                                                | 68              | 57 (34, 72)             |
| plus BMI                              | 1.53 (1.40, 1.67)                                                | 88              | 58 (38, 72)             | 1.56 (1.42, 1.72)                                                | 83              | 59 (37, 73)             |
| plus log <sub>e</sub> triglycerides   | 1.54 (1.41, 1.68)                                                | 93              | 57 (36, 71)             | 1.56 (1.42, 1.72)                                                | 89              | 57 (33, 72)             |
| plus total cholesterol                | 1.52 (1.40, 1.66)                                                | 91              | 56 (34, 70)             | 1.55 (1.41, 1.69)                                                | 86              | 56 (31, 71)             |
| plus non-HDL cholesterol <sup>§</sup> | -                                                                | -               | -                       | 1.55 (1.42, 1.70)                                                | 89              | 55 (30, 71)             |
| plus HDL cholesterol <sup>§</sup>     | -                                                                | -               | -                       | 1.55 (1.41, 1.69)                                                | 93              | 52 (25, 69)             |
| plus alcohol <sup>§</sup>             | -                                                                | -               | -                       | 1.53 (1.40, 1.67)                                                | 90              | 51 (22, 69)             |

<sup>†</sup> Risk ratios are presented per 1.11 higher log<sub>e</sub> CRP (i.e. 1-SD of observed levels at baseline), corresponding to a 3-fold higher CRP levels, progressively adjusted as shown and stratified where appropriate, by sex and trial arm.

<sup>†</sup> Analyses were restricted to participants with complete information on sex, trial arm, and all confounding variables. Studies with fewer than 10 cases were excluded from the analysis of each outcome.

<sup>§</sup> Non-HDL cholesterol has been substituted for total cholesterol in these adjusted models

I<sup>2</sup> is a measure of consistency across studies: the percentage of variance in estimated log RRs that is attributable to between study variation as opposed to sampling variation. Values of I<sup>2</sup> close to 0 correspond to lack of heterogeneity.

**eFigure 1. Study flow diagram**

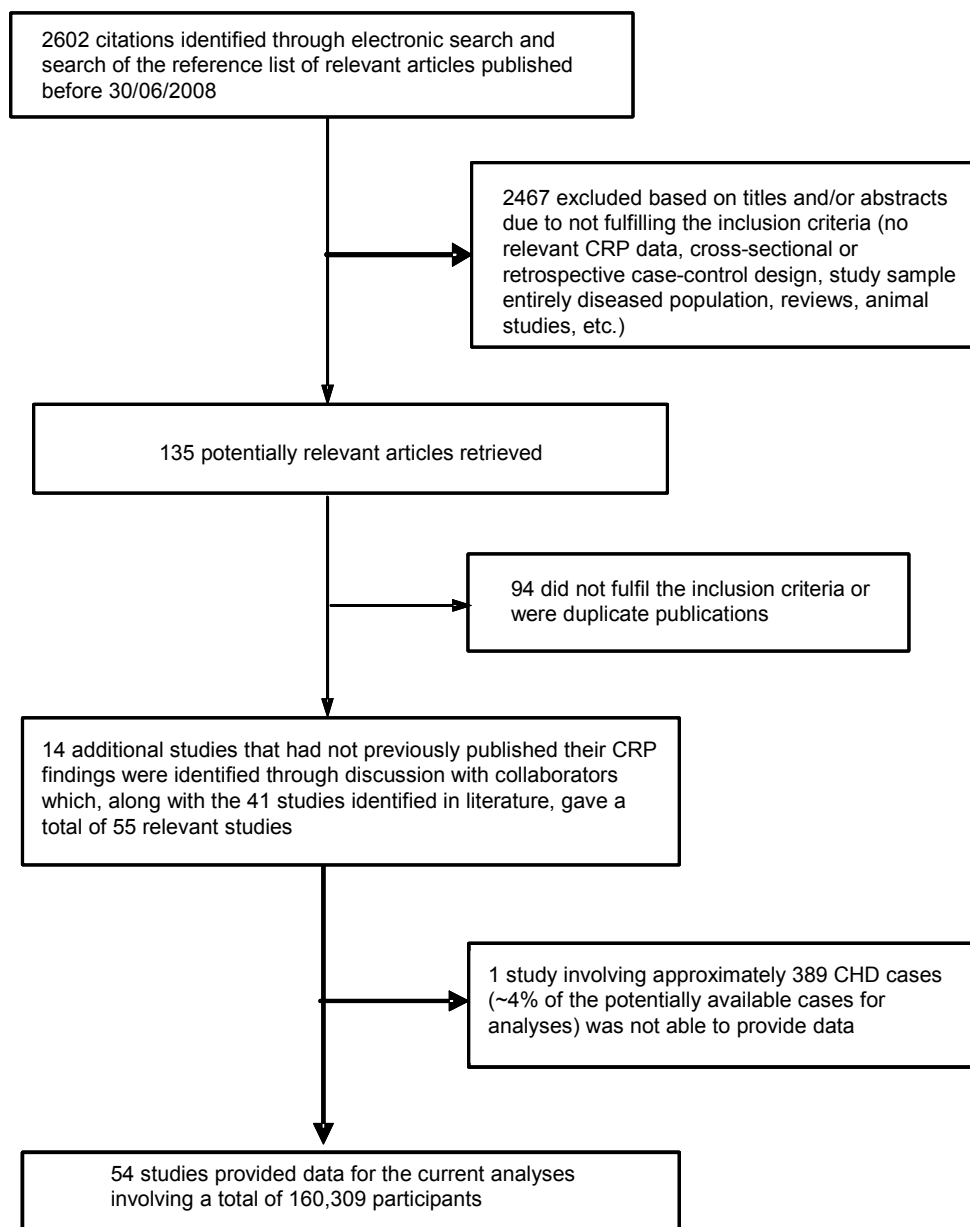

Studies were identified through electronic search of databases, scanning of the reference list of relevant articles (including previously published reviews) and discussion with investigators. Electronic searches, not limited to the English language, were performed in MEDLINE and EMBASE for studies published between January 1970 and June 2008 using terms related to CRP (e.g. “C-reactive protein”, “CRP”) and cardiovascular disease outcomes (e.g. “cardiovascular disease”, “coronary heart disease”, “myocardial infarction”, “stroke”). Studies were considered for inclusion if they had baseline information on age, sex, CRP and conventional vascular risk factors; if they did not select participants on the basis of having previous cardiovascular disease; used well-described assay methods; recorded cause-specific mortality and/or vascular morbidity using accepted criteria; and had accrued >1-year of follow-up. The reported findings on CHD from the non-contributing study were broadly similar to those in the current study.

**eFigure 2. Regression dilution ratios for log<sub>e</sub> CRP concentration plotted against time since baseline measurement by study.**

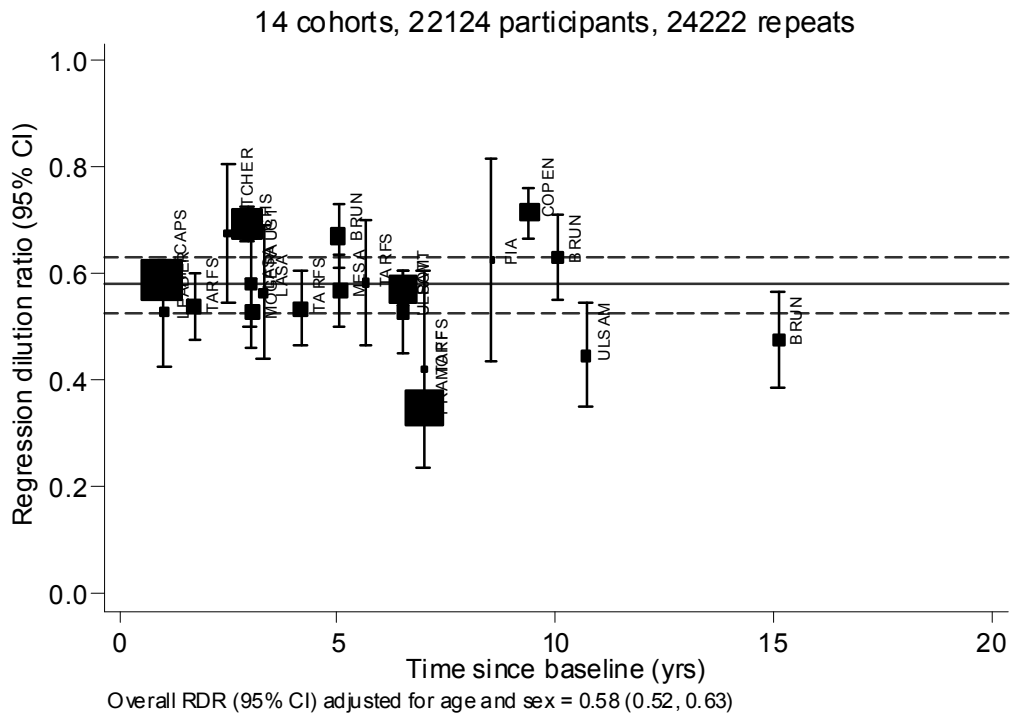

The size of the markers are inversely proportional to the variance of the regression dilution ratio. CI indicates confidence interval.

Comparisons were done to assess the comparability of baseline characteristics of the 22,124 participants who provided repeat CRP measurements with others in the same studies. Compared with individuals who did not provide repeat CRP measurements, participants who did so tended to be younger ( $p=0.002$ ), less likely to be smokers ( $p=0.02$ ) or to be diagnosed with diabetes ( $p=0.002$ ), and had lower systolic blood pressure ( $p=0.009$ ). These two groups did not, however, differ significantly in relation to sex composition, CRP concentration, body mass index, and concentration of total cholesterol, and HDL-C ( $p>0.05$  for each).



**eFigure 3. Risk ratios for major vascular and nonvascular outcomes by quantiles of CRP levels, with different degree of adjustment for potential confounders, after excluding data from first 5 years of follow up.**

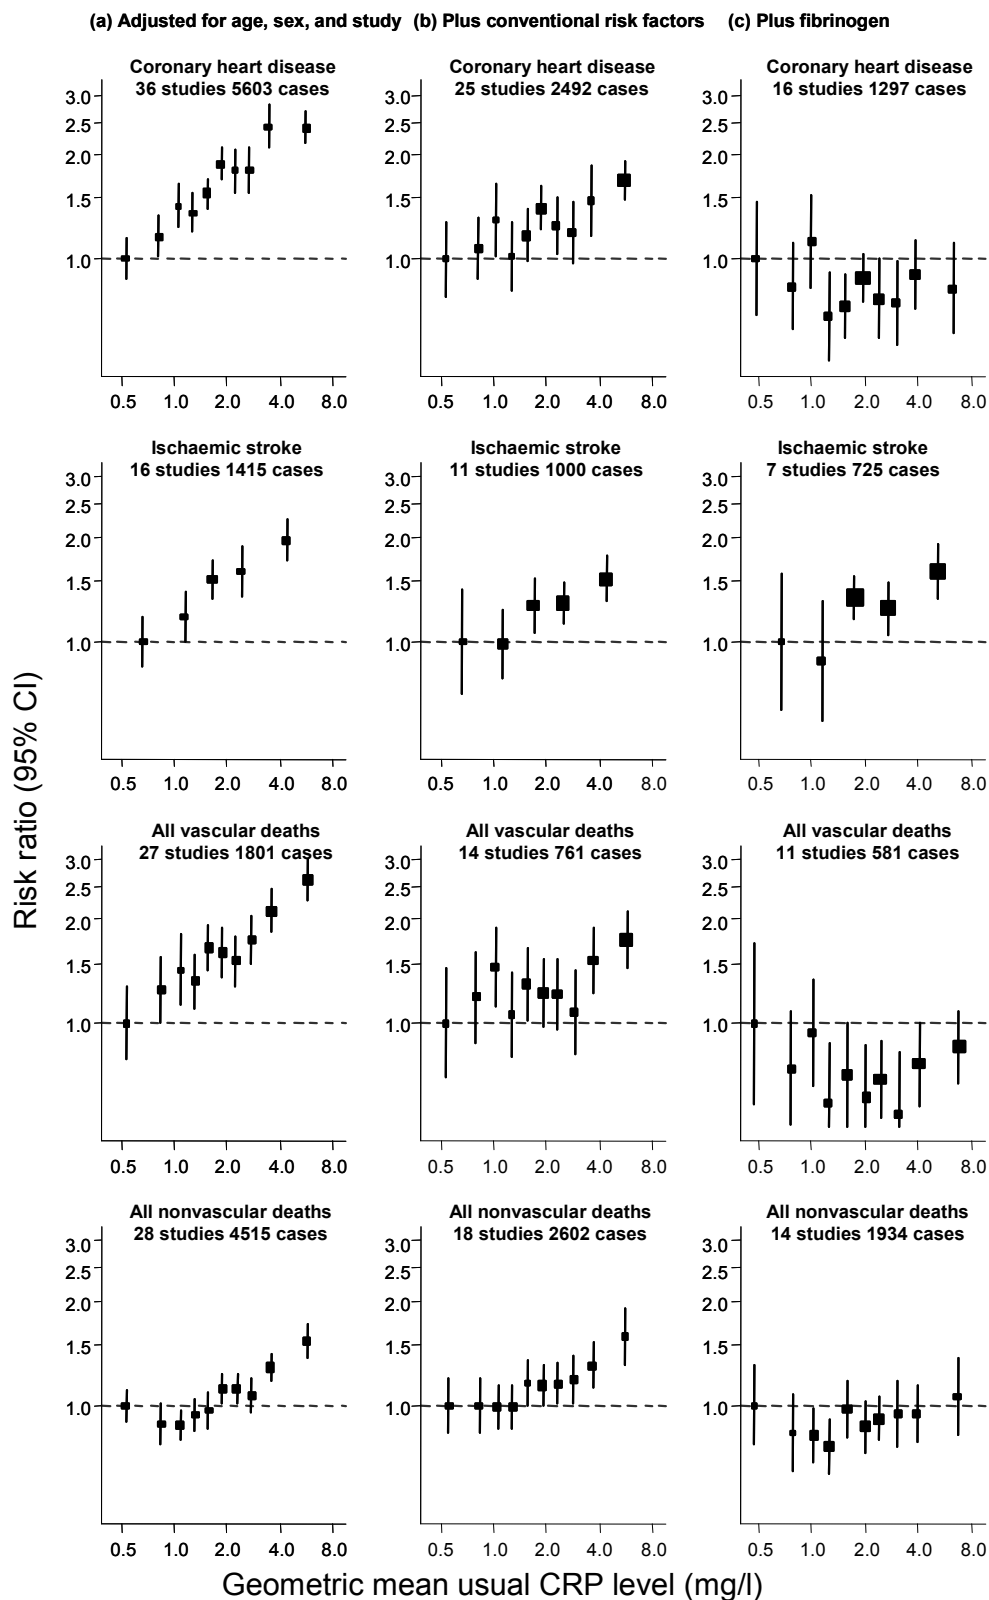

Adjusted study-specific log risk ratios were combined by multivariate random effects meta-analysis. The adjustments included age, sex, and study only in column (a); age, sex, study, systolic blood pressure, smoking, history of diabetes, BMI,  $\log_e$  triglycerides, non-HDL cholesterol, HDL cholesterol, and alcohol consumption, in column (b); and the preceding plus fibrinogen in column (c). Studies with fewer than 10 cases of any outcome were excluded from the analysis of that outcome. CI indicates confidence interval, calculated using floating absolute risk technique. The sizes of data markers are proportional to the inverse of the variance of the risk ratios.

**Figure 4. Age- and sex- adjusted only risk ratios for vascular and non-vascular mortality per 3-fold higher usual CRP levels after (a) excluding current smokers and (b) excluding data from first 5 years of follow up.**

**(a) Excluding current smokers**

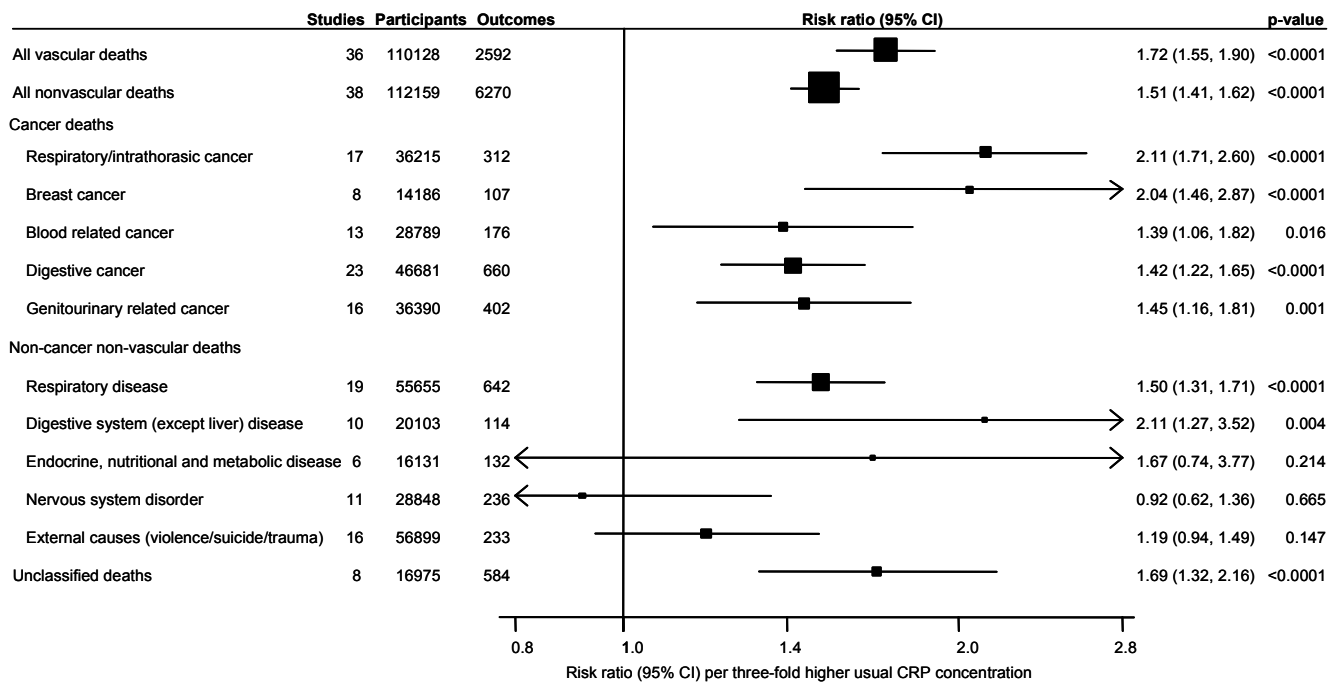

**(b) Excluding data from first 5 years of follow up**

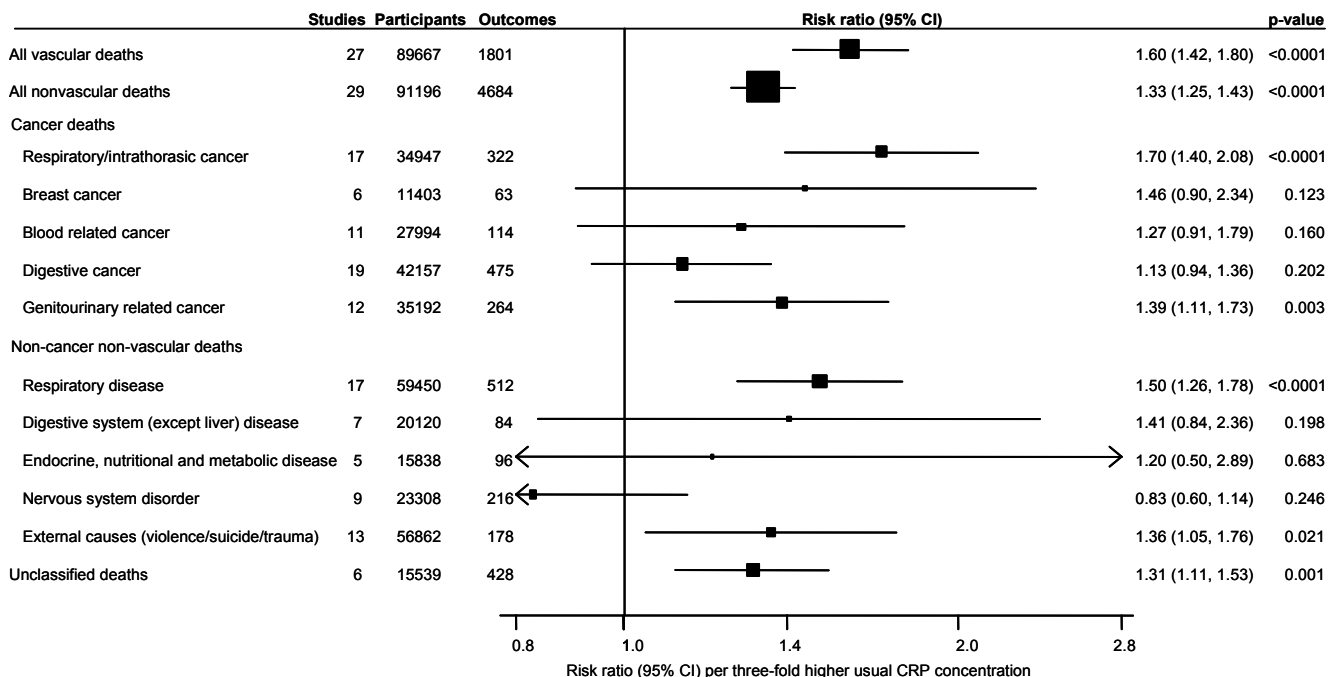

Risk ratios are adjusted only for age, and stratified where appropriate, by sex and trial arm. Studies with fewer than 10 cases of the composite all vascular and all non vascular deaths outcomes or 5 cases of the specific nonvascular outcomes were excluded from the analysis of that outcome. The risk ratios are presented per 1.11 higher log<sub>e</sub> CRP (i.e. 1-SD of observed levels at baseline), corresponding to a 3-fold higher CRP levels. Respiratory diseases included Chronic Obstructive Pulmonary Disease (COPD) and related conditions including ICD10 codes J40 – J47 (Bronchitis, Emphysema, Asthma, Other COPD, etc). CI indicates confidence interval. The sizes of data markers are proportional to the inverse of the variance of the risk ratios.

**Figure 5. Direct comparison of risk ratios for coronary heart disease per 1-SD higher log<sub>e</sub> CRP with those of systolic blood pressure and lipids mutually adjusted for each other plus other conventional risk factors.**

**(a) Baseline levels of risk factors adjusted for baseline levels of confounders**

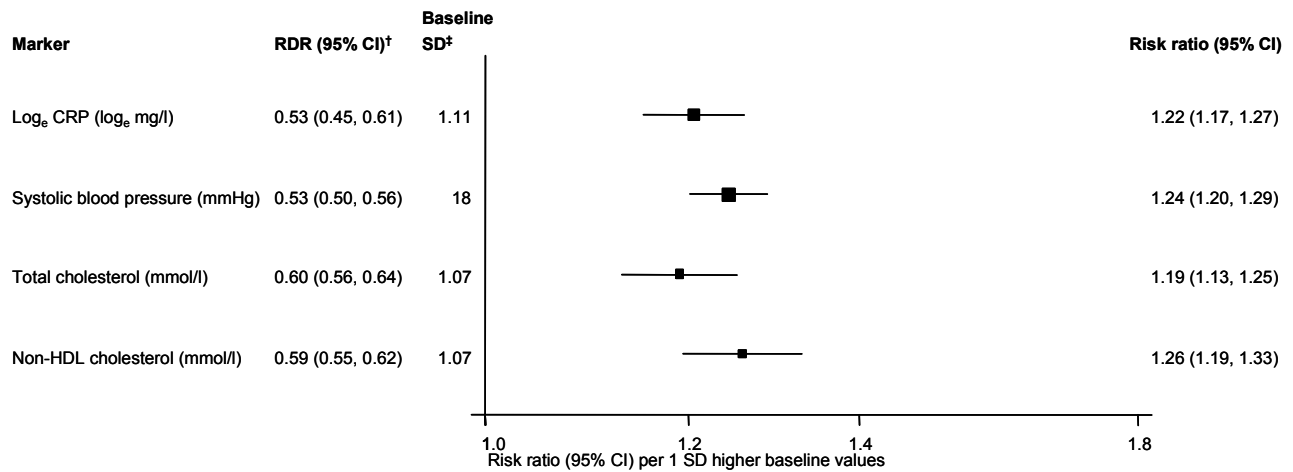

**(b) Usual levels of risk factors adjusted for usual levels of confounders**

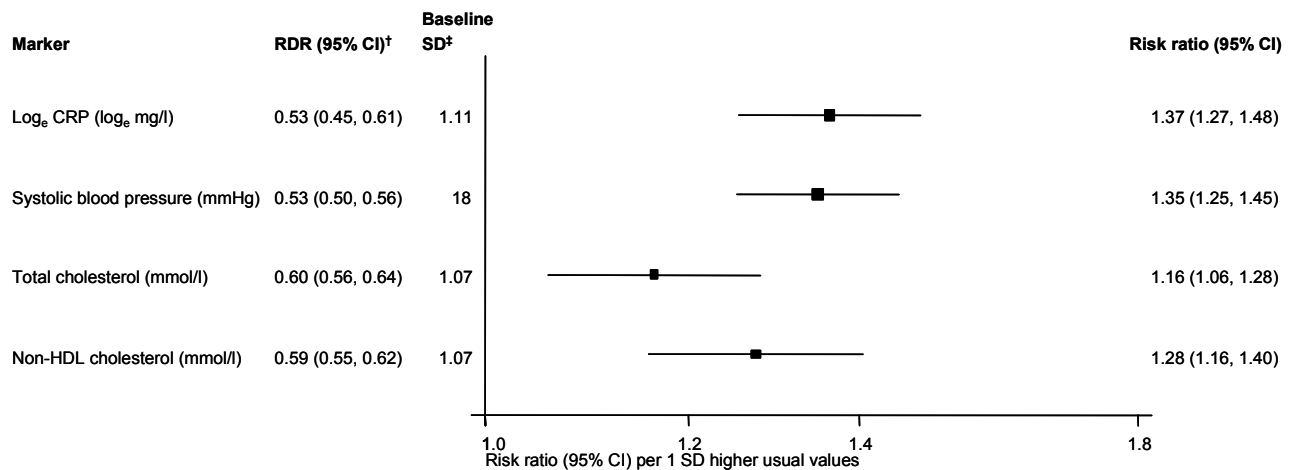

\* The direct comparisons used data from 91990 participants (5373 CHD events) from 31 studies with concomitant information on these risk factors plus age, sex, smoking status, history of diabetes, BMI, log<sub>e</sub> triglycerides, and alcohol consumption that were adjusted for. The model for non-HDL cholesterol substituted HDL cholesterol in place of total cholesterol in the adjustment.

<sup>†</sup> The regression dilution ratio (RDR) is an indicator of the long-term within person consistency of the values for each risk marker. RDR values range between 0 and 1, with values closer to 1 indicating high within person consistency of measured values. The RDRs were adjusted for baseline values of the risk factors included in the CHD risk model.

<sup>‡</sup> Baseline SD refers to the standard deviation of observed values at baseline. CI indicates confidence interval. The sizes of data markers are proportional to the inverse of the variance of the risk ratios.

**eFigure 6. Risk ratios for coronary heart disease per 3-fold higher usual CRP according to several individual level characteristics.**

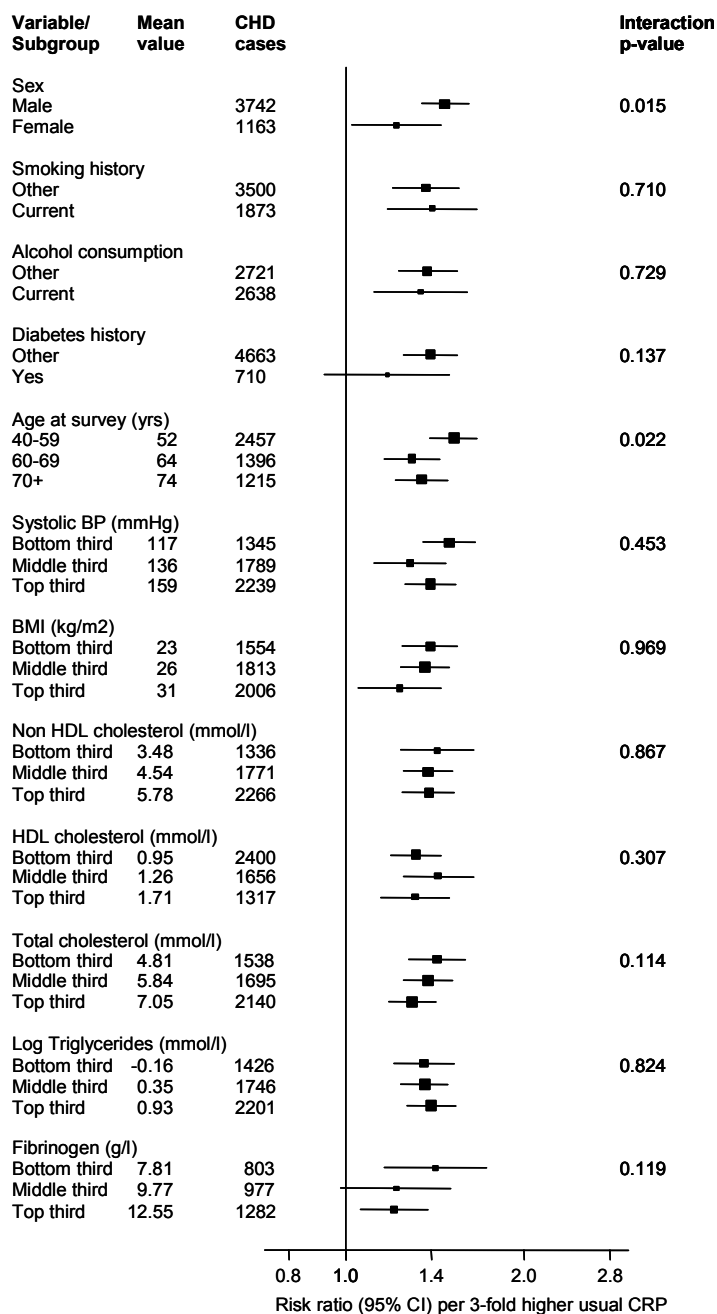

Study-specific risk ratios were adjusted for age, sex, systolic BP, smoking, history of diabetes, BMI, log<sub>e</sub> triglycerides, non-HDL cholesterol, HDL cholesterol, and alcohol consumption, stratified where appropriate, by sex and trial arm. Studies with fewer than 10 cases were excluded from the analysis. CI indicates confidence interval. The sizes of data markers are proportional to the inverse of the variance of the risk ratios.

**eFigure 7. Risk ratios for coronary heart disease per 3-fold higher usual CRP according to several individual level characteristics.**

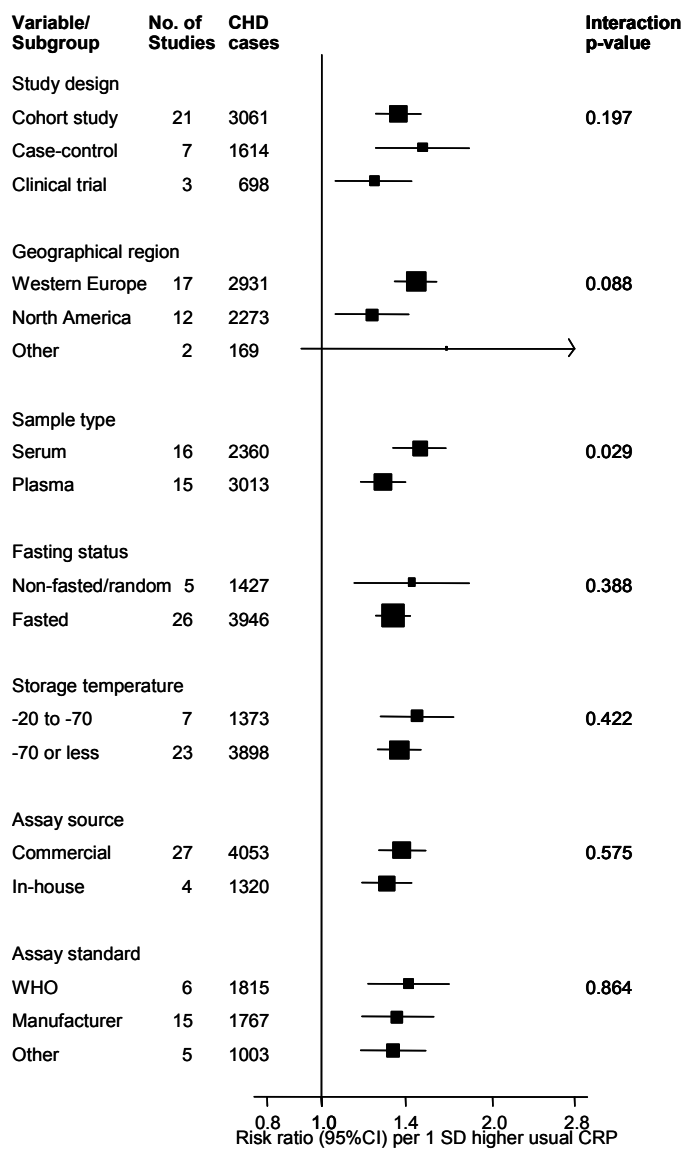

Study-specific risk ratios were adjusted for age, sex, systolic BP, smoking, history of diabetes, BMI, log<sub>e</sub> triglycerides, non-HDL cholesterol, HDL cholesterol, and alcohol consumption, stratified where appropriate, by sex and trial arm. Studies with fewer than 10 cases were excluded from the analysis. CI indicates confidence interval. The sizes of data markers are proportional to the inverse of the variance of the risk ratios.

**eFigure 8. Study-specific risk ratios for CHD per 3-fold higher usual CRP levels adjusted for all the factors in the final model in Table 2.**

**(a) Adjusted for age, sex, systolic blood pressure, smoking, history of diabetes, BMI, log<sub>e</sub> triglycerides, total cholesterol, and stratified where appropriate, by sex and trial arm.**

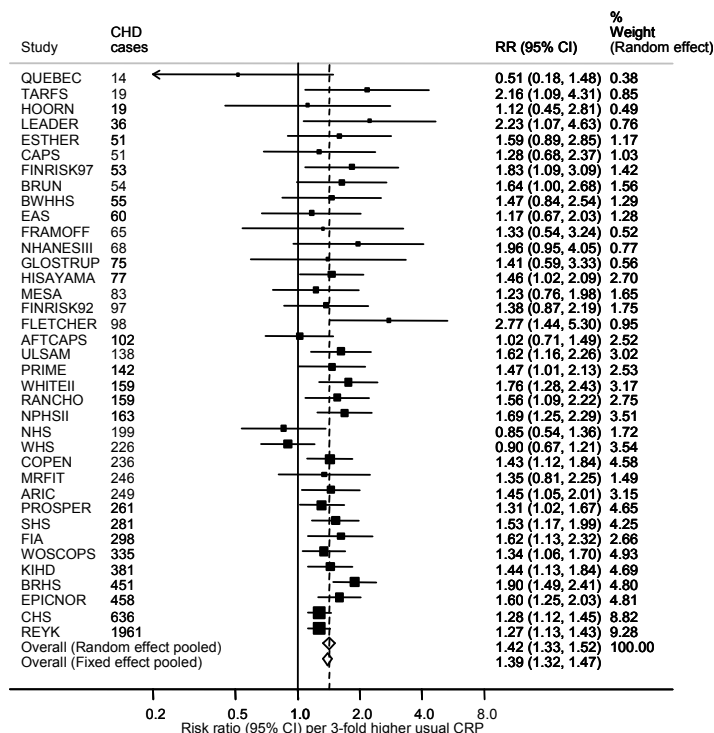

**(b) Adjusted for age, sex, systolic blood pressure, smoking, history of diabetes, BMI, log<sub>e</sub> triglycerides, non-HDL cholesterol, HDL cholesterol, alcohol consumption, and stratified where appropriate, by sex and trial arm.**

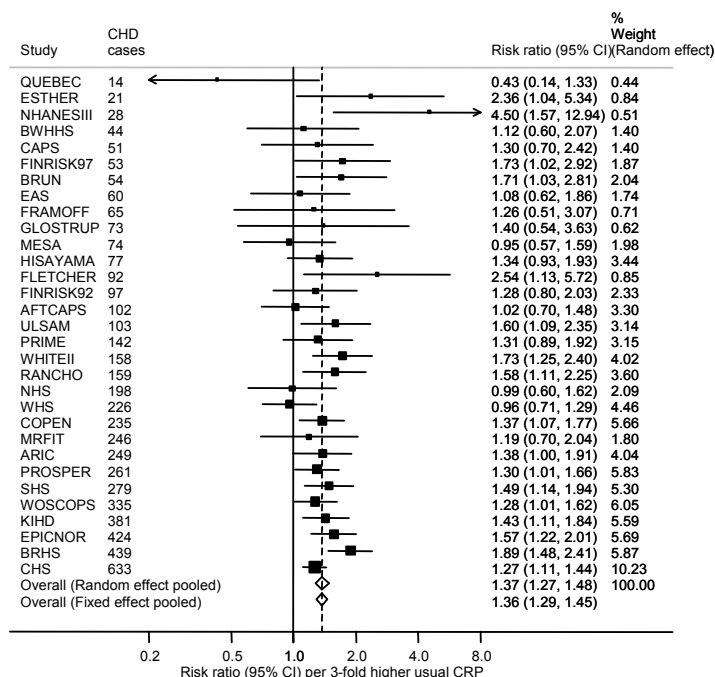

CI indicates confidence interval. The sizes of data markers are proportional to the inverse of the variance of the risk ratios. Test for heterogeneity were:  $I^2$  (95% CI) = 24% (0%, 50%),  $p=0.096$  in (a) and 26% (0%, 53%),  $p=0.095$  in (b), but the small residual heterogeneity was not significantly explained by study size as measured by the number of CHD cases recorded ( $p>0.27$  for meta-regression of log RR on the number of CHD cases).

**eFigure 9. Risk ratios for vascular and nonvascular mortality without censoring for non-fatal outcomes by quantiles of CRP levels with different degree of adjustment for potential confounders.**

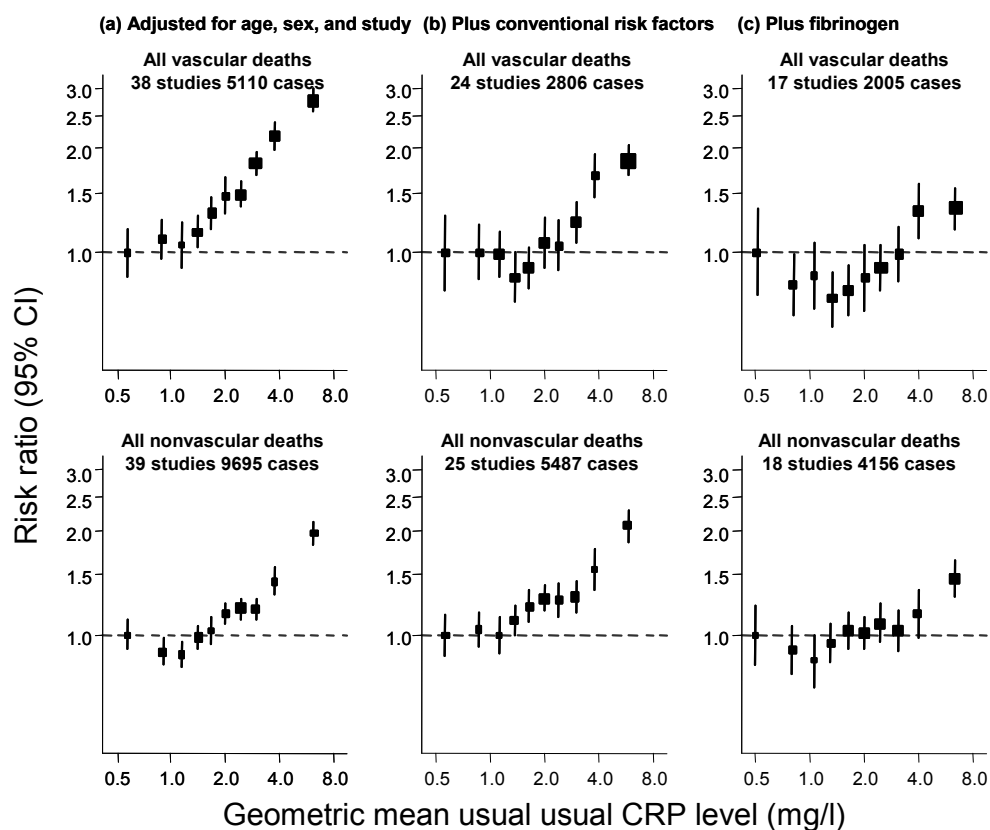

Adjusted study-specific log risk ratios were combined by multivariate random effects meta-analysis. The adjustments included age, sex, and study only in column (a); age, sex, study, systolic blood pressure, smoking, history of diabetes, BMI,  $\log_e$  triglycerides, non-HDL cholesterol, HDL cholesterol, and alcohol consumption, in column (b); and the preceding plus fibrinogen in column (c). Studies with fewer than 10 cases of any outcome were excluded from the analysis of that outcome. CI indicates confidence interval, calculated using floating absolute risk technique. The sizes of data markers are proportional to the inverse of the variance of the risk ratios.

**eFigure 10. Meta-regression plots assessing potential bias from small study effects in the meta-analysis of association of CRP levels and CHD risk.**

**(a) Adjusted for age, sex, systolic blood pressure, smoking, history of diabetes, BMI, log<sub>e</sub> triglycerides, total cholesterol, and stratified where appropriate, by sex and trial arm.**

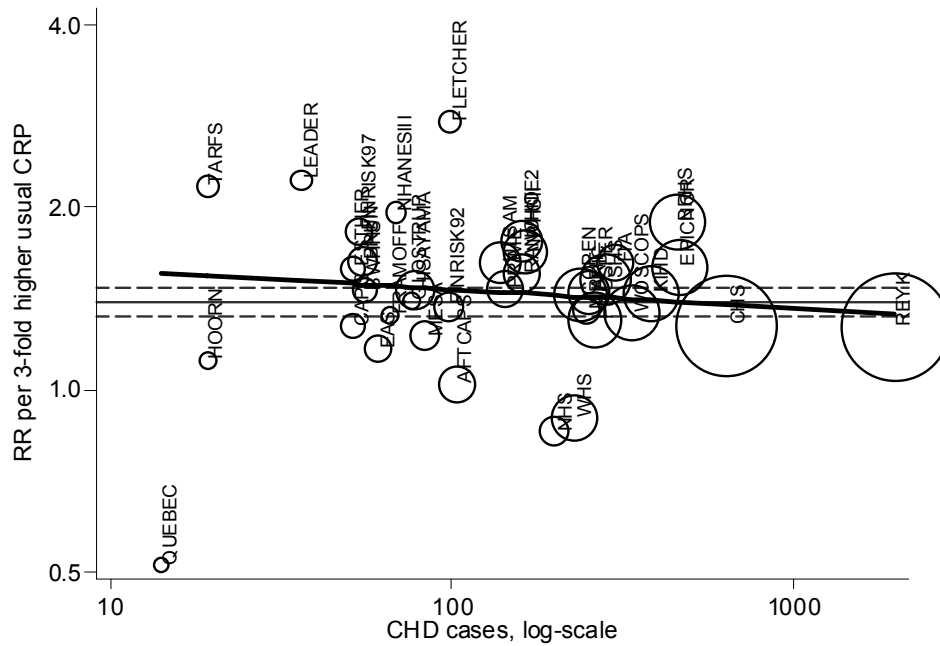

**(b) Adjusted for age, sex, systolic blood pressure, smoking, history of diabetes, BMI, log<sub>e</sub> triglycerides, non-HDL cholesterol, HDL cholesterol, alcohol consumption, and stratified where appropriate, by sex and trial arm.**

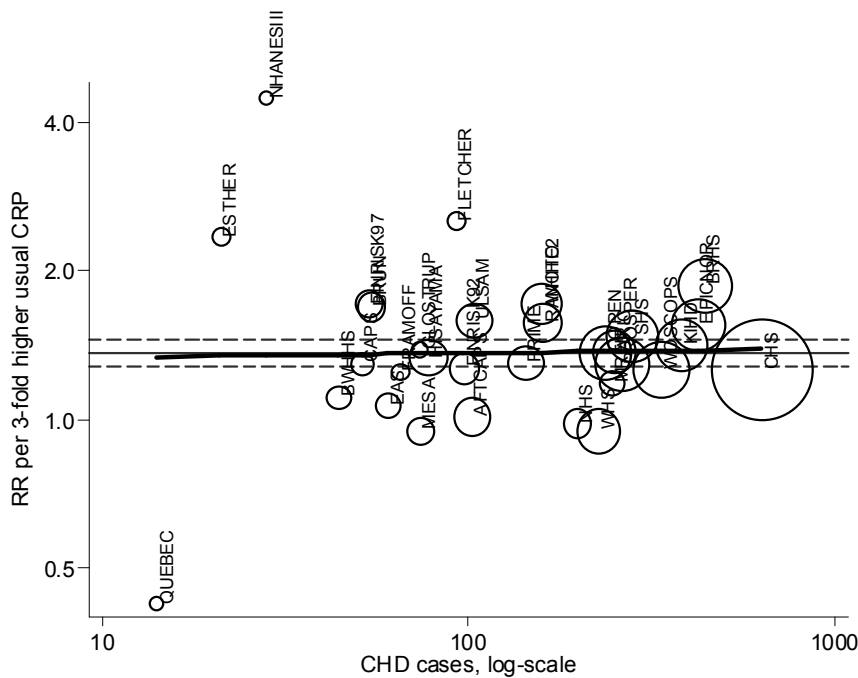

The horizontal solid line shows the overall random effect pooled estimate with 95% CI indicated by the dashed lines. The thick solid line corresponds to the meta-regression of log RR on number of CHD cases. The sizes of the markers are inversely proportional to the variance of the log RR in each study. There was no evidence of bias from small-studies (meta-regression  $p=0.27$  in (a) and  $p=0.80$  in (b)).



## Supplementary Material References

- 1 Panagiotakos DB, Pitsavos C, Chrysohoou C, Skoumas I, Stefanadis C. Five-year incidence of cardiovascular disease and its predictors in Greece: the ATTICA study. *Vasc Med* 2008;13(2):113-21.
- 2 Wiedermann CJ, Kiechl S, Dunzendorfer S, Schratzberger P, Egger G, Oberhollenzer F et al. Association of endotoxemia with carotid atherosclerosis and cardiovascular disease: prospective results from the Bruneck Study. *J Am Coll Cardiol* 1999;34(7):1975-81.
- 3 Lawlor DA, Smith GD, Rumley A, Lowe GD, Ebrahim S. Associations of fibrinogen and C-reactive protein with prevalent and incident coronary heart disease are attenuated by adjustment for confounding factors. *British Women's Heart and Health Study. Thromb Haemost* 2005;93(5):955-63.
- 4 Lowe GD, Sweetnam PM, Yarnell JW, Rumley A, Rumley C, Bainton D et al. C-reactive protein, fibrin D-dimer, and risk of ischemic heart disease: the Caerphilly and Speedwell studies. *Arterioscler Thromb Vasc Biol* 2004;24(10):1957-62.
- 5 Cushman M, Arnold AM, Psaty BM, Manolio TA, Kuller LH, Burke GL et al. C-reactive protein and the 10-year incidence of coronary heart disease in older men and women: the cardiovascular health study. *Circulation* 2005;112(1):25-31.
- 6 Kistorp C, Raymond I, Pedersen F, Gustafsson F, Faber J, Hildebrandt P. N-terminal pro-brain natriuretic peptide, C-reactive protein, and urinary albumin levels as predictors of mortality and cardiovascular events in older adults. *JAMA* 2005;293(13):1609-16.
- 7 Tzoulaki I, Murray GD, Lee AJ, Rumley A, Lowe GD, Fowkes FG. C-reactive protein, interleukin-6, and soluble adhesion molecules as predictors of progressive peripheral atherosclerosis in the general population: Edinburgh Artery Study. *Circulation* 2005;112(7):976-83.
- 8 Raum E, Rothenbacher D, Low M, Stegmaier C, Ziegler H, Brenner H. Changes of cardiovascular risk factors and their implications in subsequent birth cohorts of older adults in Germany: a life course approach. *Eur J Cardiovasc Prev Rehabil* 2007;14(6):809-14.
- 9 Jousilahti P, Salomaa V, Rasi V, Vahtera E, Palosuo T. The association of c-reactive protein, serum amyloid a and fibrinogen with prevalent coronary heart disease--baseline findings of the PAIS project. *Atherosclerosis* 2001;156(2):451-6.
- 10 Rutter MK, Meigs JB, Sullivan LM, D'Agostino RB, Sr., Wilson PW. C-reactive protein, the metabolic syndrome, and prediction of cardiovascular events in the Framingham Offspring Study. *Circulation* 2004;110(4):380-5.
- 11 Modan M, Halkin H, Lusky A, Segal P, Fuchs Z, Chetrit A. Hyperinsulinemia is characterized by jointly disturbed plasma VLDL, LDL, and HDL levels. A population-based study. *Arteriosclerosis* 1988;8(3):227-36.
- 12 Zylberstein DE, Bengtsson C, Bjorkelund C, Landaas S, Sundh V, Thelle D et al. Serum homocysteine in relation to mortality and morbidity from coronary heart disease: a 24-year follow-up of the population study of women in Gothenburg. *Circulation* 2004;109(5):601-6.
- 13 Strandberg TE, Tilvis RS. C-reactive protein, cardiovascular risk factors, and mortality in a prospective study in the elderly. *Arterioscler Thromb Vasc Biol* 2000;20(4):1057-60.
- 14 Arima H, Kubo M, Yonemoto K, Doi Y, Ninomiya T, Tanizaki Y et al. High-sensitivity C-reactive protein and coronary heart disease in a general population of Japanese: the Hisayama study. *Arterioscler Thromb Vasc Biol* 2008;28(7):1385-91.
- 15 Jager A, van H, V, Kostense PJ, Emeis JJ, Yudkin JS, Nijpels G et al. von Willebrand factor, C-reactive protein, and 5-year mortality in diabetic and nondiabetic subjects: the Hoorn Study. *Arterioscler Thromb Vasc Biol* 1999;19(12):3071-8.
- 16 Virtanen JK, Voutilainen S, Rissanen TH, Mursu J, Tuomainen TP, Korhonen MJ et al. Mercury, fish oils, and risk of acute coronary events and cardiovascular disease, coronary heart disease, and all-cause mortality in men in eastern Finland. *Arterioscler Thromb Vasc Biol* 2005;25(1):228-33.

- 17 Puts MT, Visser M, Twisk JW, Deeg DJ, Lips P. Endocrine and inflammatory markers as predictors of frailty. *Clin Endocrinol (Oxf)* 2005;63(4):403-11.
- 18 Bahrami H, Bluemke DA, Kronmal R, Bertoni AG, Lloyd-Jones DM, Shahar E et al. Novel metabolic risk factors for incident heart failure and their relationship with obesity: the MESA (Multi-Ethnic Study of Atherosclerosis) study. *J Am Coll Cardiol* 2008;51(18):1775-83.
- 19 Koenig W, Lowel H, Baumert J, Meisinger C. C-reactive protein modulates risk prediction based on the Framingham Score: implications for future risk assessment: results from a large cohort study in southern Germany. *Circulation* 2004;109(11):1349-53.
- 20 Wilhelmsen L, Johansson S, Rosengren A, Wallin I, Dotevall A, Lappas G. Risk factors for cardiovascular disease during the period 1985-1995 in Goteborg, Sweden. The GOT-MONICA Project. *J Intern Med* 1997;242(3):199-211.
- 21 Miller M, Zhan M, Havas S. High attributable risk of elevated C-reactive protein level to conventional coronary heart disease risk factors: the Third National Health and Nutrition Examination Survey. *Arch Intern Med* 2005;165(18):2063-8.
- 22 Shah T, Casas JP, Cooper JA, Tzoulaki I, Sofat R, McCormack V et al. Critical appraisal of CRP measurement for the prediction of coronary heart disease events: new data and systematic review of 31 prospective cohorts. *Int J Epidemiol* 2009;38(1):217-31.
- 23 Davidson KW, Schwartz JE, Kirkland SA, Mostofsky E, Fink D, Guernsey D et al. Relation of inflammation to depression and incident coronary heart disease (from the Canadian Nova Scotia Health Survey [NSHS95] Prospective Population Study). *Am J Cardiol* 2009;103(6):755-61.
- 24 St-Pierre AC, Bergeron J, Pirro M, Cantin B, Dagenais GR, Despres JP et al. Effect of plasma C-reactive protein levels in modulating the risk of coronary heart disease associated with small, dense, low-density lipoproteins in men (The Quebec Cardiovascular Study). *Am J Cardiol* 2003;91(5):555-8.
- 25 Langenberg C, Bergstrom J, Scheidt-Nave C, Pfeilschifter J, Barrett-Connor E. Cardiovascular death and the metabolic syndrome: role of adiposity-signaling hormones and inflammatory markers. *Diabetes Care* 2006;29(6):1363-9.
- 26 van dM, I, de Maat MP, Kiliaan AJ, van der Kuip DA, Hofman A, Witteman JC. The value of C-reactive protein in cardiovascular risk prediction: the Rotterdam Study. *Arch Intern Med* 2003;163(11):1323-8.
- 27 Best LG, Zhang Y, Lee ET, Yeh JL, Cowan L, Palmieri V et al. C-reactive protein as a predictor of cardiovascular risk in a population with a high prevalence of diabetes: the Strong Heart Study. *Circulation* 2005;112(9):1289-95.
- 28 Lowe GD, Yarnell JW, Rumley A, Bainton D, Sweetnam PM. C-reactive protein, fibrin D-dimer, and incident ischemic heart disease in the Speedwell study: are inflammation and fibrin turnover linked in pathogenesis? *Arterioscler Thromb Vasc Biol* 2001;21(4):603-10.
- 29 Onat A, Sansoy V, Yildirim B, Keles I, Uysal O, Hergenc G. C-reactive protein and coronary heart disease in western Turkey. *Am J Cardiol* 2001;88(6):601-7.
- 30 Zethelius B, Berglund L, Sundstrom J, Ingelsson E, Basu S, Larsson A et al. Use of multiple biomarkers to improve the prediction of death from cardiovascular causes. *N Engl J Med* 2008;358(20):2107-16.
- 31 Gimeno D, Brunner EJ, Lowe GD, Rumley A, Marmot MG, Ferrie JE. Adult socioeconomic position, C-reactive protein and interleukin-6 in the Whitehall II prospective study. *Eur J Epidemiol* 2007;22(10):675-83.
- 32 Ridker PM, Rifai N, Rose L, Buring JE, Cook NR. Comparison of C-reactive protein and low-density lipoprotein cholesterol levels in the prediction of first cardiovascular events. *N Engl J Med* 2002;347(20):1557-65.
- 33 Folsom AR, Aleksic N, Catellier D, Juneja HS, Wu KK. C-reactive protein and incident coronary heart disease in the Atherosclerosis Risk In Communities (ARIC) study. *Am Heart J* 2002;144(2):233-8.
- 34 Rajcecki M, Pajunen P, Jousilahti P, Rasi V, Vahtera E, Salomaa V. Hemostatic factors as predictors of stroke and cardiovascular diseases: the FINRISK '92 Hemostasis Study. *Blood Coagul Fibrinolysis* 2005;16(2):119-24.

- 35 Danesh J, Whincup P, Walker M, Lennon L, Thomson A, Appleby P et al. Low grade inflammation and coronary heart disease: prospective study and updated meta-analyses. *BMJ* 2000;321(7255):199-204.
- 36 Danesh J, Wheeler JG, Hirschfield GM, Eda S, Eiriksdottir G, Rumley A et al. C-reactive protein and other circulating markers of inflammation in the prediction of coronary heart disease. *N Engl J Med* 2004;350(14):1387-97.
- 37 Boekholdt SM, Hack CE, Sandhu MS, Luben R, Bingham SA, Wareham NJ et al. C-reactive protein levels and coronary artery disease incidence and mortality in apparently healthy men and women: the EPIC-Norfolk prospective population study 1993-2003. *Atherosclerosis* 2006;187(2):415-22.
- 38 Weinehall L, Johnson O, Jansson JH, Boman K, Huhtasaari F, Hallmans G et al. Perceived health modifies the effect of biomedical risk factors in the prediction of acute myocardial infarction. An incident case-control study from northern Sweden. *J Intern Med* 1998;243(2):99-107.
- 39 Woodward M, Rumley A, Welsh P, MacMahon S, Lowe G. A comparison of the associations between seven hemostatic or inflammatory variables and coronary heart disease. *J Thromb Haemost* 2007;5(9):1795-800.
- 40 Gram J, Bladbjerg EM, Moller L, Sjol A, Jespersen J. Tissue-type plasminogen activator and C-reactive protein in acute coronary heart disease. A nested case-control study. *J Intern Med* 2000;247(2):205-12.
- 41 Pischon T, Girman CJ, Hotamisligil GS, Rifai N, Hu FB, Rimm EB. Plasma adiponectin levels and risk of myocardial infarction in men. *JAMA* 2004;291(14):1730-7.
- 42 Kuller LH, Tracy RP, Shaten J, Meilahn EN. Relation of C-reactive protein and coronary heart disease in the MRFIT nested case-control study. Multiple Risk Factor Intervention Trial. *Am J Epidemiol* 1996;144(6):537-47.
- 43 Knight EL, Rimm EB, Pai JK, Rexrode KM, Cannuscio CC, Manson JE et al. Kidney dysfunction, inflammation, and coronary events: a prospective study. *J Am Soc Nephrol* 2004;15(7):1897-903.
- 44 Blankenberg S, Luc G, Ducimetiere P, Arveiler D, Ferrieres J, Amouyel P et al. Interleukin-18 and the risk of coronary heart disease in European men: the Prospective Epidemiological Study of Myocardial Infarction (PRIME). *Circulation* 2003;108(20):2453-9.
- 45 Ridker PM, Cushman M, Stampfer MJ, Tracy RP, Hennekens CH. Inflammation, aspirin, and the risk of cardiovascular disease in apparently healthy men. *N Engl J Med* 1997;336(14):973-9.
- 46 Kaplan RC, McGinn AP, Baird AE, Hendrix SL, Kooperberg C, Lynch J et al. Inflammation and hemostasis biomarkers for predicting stroke in postmenopausal women: the Women's Health Initiative Observational Study. *J Stroke Cerebrovasc Dis* 2008;17(6):344-55.
- 47 Ridker PM, Rifai N, Clearfield M, Downs JR, Weis SE, Miles JS et al. Measurement of C-reactive protein for the targeting of statin therapy in the primary prevention of acute coronary events. *N Engl J Med* 2001;344(26):1959-65.
- 48 Meade TW. Design and intermediate results of the Lower Extremity Arterial Disease Event Reduction (LEADER)\* trial of bezafibrate in men with lower extremity arterial disease [ISRCTN4119421]. *Curr Control Trials Cardiovasc Med* 2001;2(4):195-204.
- 49 Sattar N, Murray HM, McConnachie A, Blauw GJ, Bollen EL, Buckley BM et al. C-reactive protein and prediction of coronary heart disease and global vascular events in the Prospective Study of Pravastatin in the Elderly at Risk (PROSPER). *Circulation* 2007;115(8):981-9.
- 50 Christen WG, Gaziano JM, Hennekens CH. Design of Physicians' Health Study II--a randomized trial of beta-carotene, vitamins E and C, and multivitamins, in prevention of cancer, cardiovascular disease, and eye disease, and review of results of completed trials. *Ann Epidemiol* 2000;10(2):125-34.
- 51 Sattar N, Gaw A, Scherbakova O, Ford I, O'Reilly DS, Haffner SM et al. Metabolic syndrome with and without C-reactive protein as a predictor of coronary heart disease and diabetes in the West of Scotland Coronary Prevention Study. *Circulation* 2003;108(4):414-9.
